# Supplementary material
Source: PubMed Central journal article supplement (PMC7346889)
Supplement: jjz184_suppl_supplementary_table_s1.pdf [file jjz184_suppl_supplementary_table_s1.pdf]

| Index | miR_name                    | miR_seq                 | DSS treated 1 | Before treatment 1 | Before Treatment 2 | Back to normal 1 | Back to normal 2 | Recovery 2 | DSS_treated 2 | Recovery 1 | Expression level |
|-------|-----------------------------|-------------------------|---------------|--------------------|--------------------|------------------|------------------|------------|---------------|------------|------------------|
| 1     | PC-5p-64929_97              | CCCTAAGATGAGATCTCT      | 19            | 22                 | 28                 | 26               | 28               | 0          | 0             | 4          | middle           |
| 2     | PC-5p-83204_75              | TACAAGCAGATATAGCACT     | 15            | 18                 | 11                 | 13               | 16               | 6          | 2             | 4          | middle           |
| 3     | PC-5p-28717_207             | AACATGAGAGTTTGATCCT     | 164           | 187                | 156                | 104              | 165              | 52         | 9             | 25         | high             |
| 4     | PC-3p-101610_59             | CAAGATGGCTGAGGGGACA     | 14            | 21                 | 11                 | 14               | 14               | 0          | 0             | 0          | middle           |
| 5     | PC-3p-64895_97              | GGGACACAGAAGGATAGT      | 20            | 39                 | 30                 | 27               | 30               | 9          | 4             | 10         | middle           |
| 6     | PC-3p-30946_194             | AAGGTGAGGTATATGAGC      | 67            | 43                 | 48                 | 42               | 44               | 13         | 0             | 13         | middle           |
| 7     | rno-mir-711-p3_1ss3GT       | GGTAAAGCTGGGGACCCT      | 5             | 7                  | 11                 | 10               | 9                | 0          | 0             | 0          | middle           |
| 8     | PC-5p-41107_151             | AGGCTAATATCGTTGACT      | 25            | 62                 | 72                 | 59               | 46               | 0          | 0             | 14         | middle           |
| 9     | PC-3p-4173_897              | GCTGGAAGGTTAAGAGGA      | 188           | 290                | 336                | 288              | 232              | 100        | 113           | 145        | high             |
| 10    | mmu-miR-140-3p_L-1R+2       | ACCACAGGGTAGAACCCAGGAC  | 38            | 7                  | 0                  | 0                | 0                | 44         | 50            | 58         | middle           |
| 11    | PC-5p-32769_185             | GAGATTTGAAGGGAGCTGTC    | 60            | 103                | 84                 | 130              | 110              | 43         | 16            | 36         | middle           |
| 12    | PC-5p-24662_235             | CGTGTGGCTATGAAACCT      | 74            | 128                | 193                | 122              | 152              | 43         | 17            | 43         | high             |
| 13    | PC-5p-59712_106             | AAAGCTTTCGGATGACCT      | 34            | 31                 | 26                 | 9                | 27               | 0          | 4             | 5          | middle           |
| 14    | PC-3p-89652_69              | GTTGCATGTGAATTCATC      | 6             | 16                 | 22                 | 14               | 14               | 0          | 4             | 3          | middle           |
| 15    | PC-5p-89052_69              | GATGGCGGCCCTCGCTCC      | 17            | 12                 | 39                 | 33               | 34               | 0          | 0             | 0          | middle           |
| 16    | PC-5p-157248_32             | GCGGGTAGTTTGACTGGG      | 6             | 10                 | 17                 | 9                | 7                | 0          | 0             | 0          | middle           |
| 17    | PC-3p-67404_94              | GTAAGTACACTGAGGCT       | 23            | 9                  | 18                 | 30               | 24               | 6          | 2             | 4          | middle           |
| 18    | PC-5p-56203_113             | GTTAAGGAACCTCGGCAAGTT   | 10            | 19                 | 14                 | 11               | 9                | 6          | 0             | 2          | middle           |
| 19    | PC-5p-71575_88              | GTGTCTGCTAATTCTTCTCT    | 11            | 21                 | 22                 | 42               | 24               | 0          | 4             | 0          | middle           |
| 20    | PC-5p-52772_120             | GGTGACTGGGGTGAAGTC      | 16            | 39                 | 26                 | 33               | 19               | 7          | 5             | 11         | middle           |
| 21    | mmu-miR-151-3p_R+1          | CTAGACTGAGGCTCCTTGAGGA  | 23            | 0                  | 7                  | 0                | 0                | 22         | 29            | 27         | middle           |
| 22    | bta-mir-2904-2-p3_1ss15TC   | AGCCTCGGTTGGCCCCGATAGCC | 8             | 16                 | 12                 | 22               | 13               | 3          | 6             | 1          | middle           |
| 23    | pal-miR-9226-5p_L-2_1ss4AG  | AGGTCCCTGTTGCGGCGCCA    | 14            | 7                  | 26                 | 21               | 17               | 7          | 2             | 0          | middle           |
| 24    | PC-3p-93543_65              | GGTGGAGACCGCACACAC      | 6             | 15                 | 17                 | 20               | 23               | 7          | 0             | 0          | middle           |
| 25    | mmu-mir-5119-p3_1ss6TG      | TCATCGCATCCTGGGGCT      | 17            | 13                 | 43                 | 24               | 33               | 6          | 0             | 4          | middle           |
| 26    | PC-5p-100392_60             | GAAGTATAACCAGAAAACC     | 6             | 22                 | 10                 | 11               | 19               | 0          | 4             | 0          | middle           |
| 27    | PC-5p-19499_284             | AAGAACAGAGCAGAACGGC     | 98            | 19                 | 78                 | 67               | 47               | 13         | 0             | 0          | middle           |
| 28    | PC-3p-43069_145             | GGTCTCCTACCTACTCTGC     | 23            | 43                 | 47                 | 96               | 68               | 0          | 0             | 15         | middle           |
| 29    | PC-3p-136506_40             | CTGCCGTTGAAACTGCATCC    | 19            | 12                 | 14                 | 20               | 21               | 0          | 0             | 8          | middle           |
| 30    | PC-5p-47677_132             | GAGATAGCTGGTTCTCCCC     | 16            | 27                 | 30                 | 23               | 38               | 16         | 4             | 7          | middle           |
| 31    | bta-miR-378_R+1             | ACTGGACTTGGAGTCAGAAGGCT | 25            | 22                 | 47                 | 13               | 17               | 58         | 50            | 41         | middle           |
| 32    | aja-mir-671-p3_1ss18GC      | AGGGCTCCACCTCTTCCC      | 27            | 62                 | 22                 | 36               | 85               | 0          | 0             | 0          | middle           |
| 33    | PC-5p-73161_86              | GAATCAGAATGTCGGGGTG     | 10            | 13                 | 29                 | 23               | 34               | 10         | 0             | 0          | middle           |
| 34    | PC-5p-113008_52             | GGAGCCGGTAACTGGGGT      | 12            | 12                 | 37                 | 27               | 19               | 7          | 0             | 4          | middle           |
| 35    | PC-3p-196912_22             | AGTGTATTGGTAGAGGAGC     | 7             | 0                  | 10                 | 9                | 7                | 0          | 0             | 0          | low              |
| 36    | PC-3p-116868_49             | GTCACATCCCGGGGCTGG      | 31            | 25                 | 25                 | 0                | 24               | 0          | 0             | 3          | middle           |
| 37    | bta-miR-11987_L-2R-1_1ss8TA | AGGAAACTCTGGTGGAGG      | 3             | 11                 | 5                  | 9                | 5                | 0          | 2             | 2          | middle           |
| 38    | PC-3p-84309_74              | AGGTTAAGAGGAGAGGTTA     | 10            | 13                 | 22                 | 16               | 20               | 0          | 7             | 8          | middle           |
| 39    | PC-3p-211437_19             | TGTAGTATCGGTGAAGATGC    | 15            | 19                 | 8                  | 7                | 9                | 6          | 3             | 0          | middle           |
| 40    | PC-3p-132361_42             | GAAGTGAACATCTTAGTA      | 7             | 7                  | 7                  | 9                | 13               | 0          | 0             | 5          | middle           |
| 41    | PC-3p-112124_52             | CAATTATGGAGAGTTTGAT     | 14            | 7                  | 7                  | 10               | 11               | 6          | 2             | 0          | middle           |
| 42    | mmu-miR-378a-3p_R+1         | ACTGGACTTGGAGTCAGAAGGC  | 178           | 262                | 180                | 264              | 162              | 275        | 297           | 290        | high             |
| 43    | PC-5p-82362_76              | TGTTAAGGAACTCGGCAA      | 5             | 6                  | 13                 | 8                | 7                | 0          | 1             | 4          | middle           |
| 44    | mmu-miR-99a-5p_R-1          | AACCCGTAGATCCGATCTTGT   | 116           | 39                 | 60                 | 57               | 63               | 110        | 169           | 149        | high             |
| 45    | mmu-miR-100-5p_R-1_1ss16AT  | AACCCGTAGATCCGATCTTGT   | 116           | 39                 | 60                 | 57               | 63               | 110        | 169           | 149        | high             |
| 46    | PC-5p-82477_75              | ATGCGAGGGCTTCACCGCC     | 55            | 101                | 65                 | 7                | 95               | 0          | 0             | 20         | middle           |
| 47    | PC-3p-9419_502              | AGCTGGGTTTCAGAACGTC     | 209           | 414                | 407                | 309              | 363              | 156        | 32            | 196        | high             |
| 48    | PC-5p-92751_66              | GGCATAAGTAGCGAGAGG      | 44            | 9                  | 89                 | 39               | 53               | 6          | 0             | 0          | middle           |
| 49    | mmu-mir-5108-p3_1ss3TA      | GAGAGTAGAGCACTGGAT      | 7             | 45                 | 34                 | 67               | 28               | 11         | 0             | 0          | middle           |
| 50    | PC-3p-55588_114             | TGAGTACTGGAGAGGCA       | 34            | 70                 | 26                 | 94               | 48               | 12         | 10            | 15         | middle           |
| 51    | PC-3p-52393_121             | GTTCTTGTGCTGTGGATGTC    | 12            | 41                 | 52                 | 63               | 48               | 0          | 9             | 24         | middle           |
| 52    | PC-5p-52393_121             | GTTCTTGTGCTGTGGATGTC    | 12            | 41                 | 52                 | 63               | 48               | 0          | 9             | 24         | middle           |
| 53    | PC-5p-15481_342             | GGAGGGAAGCGGATGGGGG     | 36            | 92                 | 40                 | 113              | 63               | 30         | 12            | 16         | middle           |
| 54    | mmu-miR-30e-3p              | CTTTCAGTCGGATGTTACAGC   | 22            | 9                  | 0                  | 0                | 0                | 20         | 22            | 19         | middle           |
| 55    | PC-5p-43913_142             | AGCACGAGAAATCTGTC       | 83            | 40                 | 55                 | 0                | 46               | 0          | 0             | 0          | middle           |
| 56    | PC-3p-141420_38             | AGGAGAAGAAAACAACAGT     | 12            | 16                 | 7                  | 0                | 10               | 0          | 0             | 0          | middle           |
| 57    | PC-3p-105972_56             | GTTGACTCCCGGTGTGGGAACC  | 2             | 7                  | 4                  | 9                | 16               | 0          | 0             | 0          | middle           |
| 58    | mmu-miR-186-5p              | CAAAGAATTCTCTTTTGGGCT   | 105           | 15                 | 37                 | 34               | 28               | 89         | 96            | 138        | middle           |
| 59    | PC-5p-125445_45             | AGGAGTGAAGTTTGGTGA      | 12            | 12                 | 25                 | 33               | 7                | 0          | 0             | 7          | middle           |
| 60    | PC-5p-138993_39             | GGATGACCTGTGGATAGCGG    | 23            | 25                 | 10                 | 31               | 11               | 11         | 3             | 5          | middle           |

|     |                             |                          |     |       |     |       |       |     |       |       |        |
|-----|-----------------------------|--------------------------|-----|-------|-----|-------|-------|-----|-------|-------|--------|
| 61  | PC-5p-168746_29             | TCTGCCCCACAATACTTGGC     | 5   | 9     | 0   | 11    | 13    | 0   | 0     | 0     | middle |
| 62  | PC-3p-71684_88              | AGAGGCCGTGAGTTCAAGTCT    | 16  | 7     | 26  | 9     | 19    | 0   | 6     | 6     | middle |
| 63  | PC-3p-137754_39             | AGAGATGCGTAGCTGATGG      | 23  | 25    | 0   | 9     | 19    | 0   | 0     | 0     | middle |
| 64  | PC-5p-242185_15             | TTAAGAGGAGACGTTAGG       | 4   | 7     | 0   | 11    | 10    | 0   | 0     | 0     | middle |
| 65  | PC-3p-3757_960              | TAGTAGGAGGAGAAAAGA       | 119 | 199   | 145 | 253   | 184   | 246 | 340   | 275   | high   |
| 66  | bta-miR-11980_R-1_1ss4CG    | AGGGAACGGGCTTGGCGGA      | 3   | 15    | 8   | 12    | 15    | 3   | 2     | 5     | middle |
| 67  | mmu-miR-30e-5p_R+2          | TGTAAACATCCTTGACTGGAAGCT | 285 | 135   | 134 | 130   | 130   | 241 | 300   | 241   | high   |
| 68  | PC-5p-7927_569              | GAAGCAGATATGAACAAACC     | 56  | 113   | 153 | 125   | 154   | 72  | 78    | 46    | middle |
| 69  | PC-3p-156650_32             | GTTCCCTGTCCAACATCCT      | 0   | 7     | 10  | 10    | 19    | 0   | 0     | 0     | middle |
| 70  | PC-3p-95597_64              | GGGTAGCCGCTCTGGGC        | 23  | 37    | 8   | 10    | 9     | 0   | 0     | 0     | middle |
| 71  | PC-3p-144238_37             | AGGACCGGGATGGACACA       | 14  | 21    | 25  | 0     | 13    | 0   | 0     | 6     | middle |
| 72  | PC-3p-169435_29             | CTGGTCTGCAACTGACACT      | 5   | 9     | 0   | 9     | 16    | 0   | 0     | 0     | middle |
| 73  | hsa-miR-1469_L-4_1ss10GC    | GCGCGCGGCGCGGGCTCC       | 14  | 7     | 10  | 0     | 9     | 0   | 0     | 4     | middle |
| 74  | PC-3p-23428_246             | AGGTAACACTGACTGGAGGG     | 77  | 144   | 94  | 89    | 80    | 65  | 2     | 18    | middle |
| 75  | mmu-miR-30c-5p_R+1          | TGTAAACATCCTACTCTCAGCT   | 172 | 145   | 118 | 138   | 128   | 236 | 260   | 345   | high   |
| 76  | bta-mir-2904-2-p3_1ss12TC   | CTCGGTTGGCCCCGGATAGCC    | 9   | 30    | 12  | 16    | 29    | 11  | 4     | 4     | middle |
| 77  | bta-mir-2904-2-p5_1ss12TC   | CTCGGTTGGCCCCGGATAGCC    | 9   | 30    | 12  | 16    | 29    | 11  | 4     | 4     | middle |
| 78  | PC-3p-84288_74              | ATAGAGGAGACAGACCAGG      | 18  | 0     | 14  | 21    | 17    | 6   | 4     | 0     | middle |
| 79  | mmu-miR-429-3p              | TAATACTGTCTGGTAATGCCGT   | 123 | 170   | 134 | 179   | 169   | 133 | 97    | 86    | high   |
| 80  | PC-5p-94450_65              | GGTATAGTGCTGATAAACA      | 0   | 48    | 23  | 54    | 31    | 7   | 6     | 0     | middle |
| 81  | PC-3p-10765_453             | CCAGGAAGGGAGAATGCC       | 71  | 118   | 332 | 119   | 137   | 67  | 0     | 12    | high   |
| 82  | mmu-miR-484                 | TCAGGCTCAGTCCCTCCCGAT    | 15  | 7     | 0   | 9     | 0     | 25  | 41    | 55    | middle |
| 83  | mmu-miR-5106_L-3R+1_1ss20CT | TCTGTAGCTCAGTTGGTAGAG    | 19  | 67    | 15  | 92    | 34    | 11  | 0     | 3     | middle |
| 84  | mmu-miR-96-5p               | TTTGGCACTAGCACATTTTGTCT  | 27  | 61    | 52  | 37    | 33    | 82  | 58    | 63    | middle |
| 85  | PC-5p-130968_42             | GCATAGTGTAGTAGGAAGA      | 16  | 0     | 14  | 40    | 20    | 0   | 0     | 0     | middle |
| 86  | PC-3p-77153_81              | AGAAGAGCTTAGAGATAAG      | 11  | 13    | 28  | 13    | 7     | 0   | 4     | 8     | middle |
| 87  | PC-3p-29250_204             | GGGAAGATAGGTAGTGCC       | 49  | 89    | 104 | 41    | 64    | 11  | 36    | 46    | middle |
| 88  | mmu-miR-361-5p              | TTATCAGAATCTCCAGGGGTAC   | 0   | 0     | 0   | 0     | 0     | 11  | 17    | 7     | middle |
| 89  | PC-5p-141515_38             | TTTTTCGAGAGTTTGATC       | 7   | 15    | 28  | 0     | 16    | 0   | 2     | 0     | middle |
| 90  | PC-5p-165416_30             | TAGGAGGAAGAGCCATGAAG     | 0   | 7     | 11  | 11    | 9     | 0   | 0     | 5     | middle |
| 91  | mmu-miR-26a-5p              | TTCAAGTAATCCAGGATAGGCT   | 817 | 404   | 533 | 428   | 390   | 700 | 1,024 | 1,151 | high   |
| 92  | PC-5p-48908_128             | AAAACCTGTTGGACTTGAGTG    | 30  | 10    | 30  | 52    | 27    | 20  | 2     | 7     | middle |
| 93  | PC-5p-78770_79              | GCTTACAAGCACTCAGAGC      | 13  | 13    | 10  | 17    | 21    | 10  | 0     | 6     | middle |
| 94  | PC-3p-58991_107             | CAGCCTTGTGAGTTACTAAT     | 44  | 51    | 0   | 19    | 53    | 7   | 4     | 11    | middle |
| 95  | eca-mir-9112-p3_1ss18AC     | GTTAGGAGCAGAGATGAC       | 12  | 31    | 52  | 67    | 51    | 8   | 12    | 29    | middle |
| 96  | PC-5p-8347_547              | GAGGGCTGGGCACGGGGGT      | 113 | 43    | 249 | 79    | 77    | 40  | 8     | 19    | high   |
| 97  | mmu-miR-374c-5p_L+2R-1      | ATATAATACAACCTGCTAAGT    | 6   | 12    | 10  | 7     | 0     | 15  | 30    | 19    | middle |
| 98  | mmu-miR-142a-5p_L+2R-3      | CCCATAAAGTAGAAAGCACT     | 403 | 65    | 72  | 74    | 95    | 391 | 239   | 314   | high   |
| 99  | PC-3p-182654_25             | TGAGATTGGTAGGGGAGC       | 19  | 0     | 19  | 0     | 17    | 0   | 0     | 0     | middle |
| 100 | PC-5p-200607_21             | CAGTTCAAGTCTGACTACC      | 8   | 0     | 8   | 0     | 7     | 0   | 0     | 0     | low    |
| 101 | PC-3p-95788_63              | CTCCAGGCATTGAAGAATT      | 13  | 7     | 28  | 14    | 7     | 0   | 8     | 4     | middle |
| 102 | PC-3p-237582_15             | AAGCGCTTGAGAGAACT        | 7   | 9     | 0   | 0     | 9     | 0   | 0     | 0     | low    |
| 103 | PC-3p-85446_72              | ACTGTGGGTGATAAGGTCC      | 6   | 24    | 10  | 19    | 14    | 10  | 0     | 5     | middle |
| 104 | PC-3p-213436_19             | GAAGGTCATGTGGTTCAA       | 6   | 0     | 0   | 9     | 7     | 0   | 0     | 0     | low    |
| 105 | mmu-miR-103-3p              | AGCAGCATTTGTACAGGGCTATGA | 53  | 42    | 32  | 53    | 22    | 60  | 106   | 115   | middle |
| 106 | PC-3p-226380_17             | GATTTGCTGGACTGTAAC       | 10  | 0     | 7   | 7     | 0     | 0   | 0     | 0     | low    |
| 107 | mmu-miR-20a-5p              | TAAAGTGCTTATAGTGCAGGTAG  | 9   | 10    | 0   | 0     | 0     | 12  | 20    | 9     | middle |
| 108 | PC-5p-18345_299             | TCGCCGAAGCTCAGGAAGG      | 46  | 97    | 47  | 126   | 60    | 43  | 12    | 47    | middle |
| 109 | PC-5p-52557_120             | ACCAGAGAGGGTGAAAGTC      | 38  | 10    | 73  | 9     | 23    | 8   | 0     | 0     | middle |
| 110 | PC-3p-279676_11             | ACGGGGAGTTTACTGGGG       | 0   | 9     | 11  | 7     | 0     | 0   | 0     | 0     | middle |
| 111 | PC-3p-201267_21             | AACTCTGTACAGACCGCC       | 15  | 0     | 0   | 10    | 11    | 0   | 0     | 0     | middle |
| 112 | PC-5p-198261_22             | ACGAGAAGAAAATTC TAAGA    | 7   | 0     | 11  | 0     | 7     | 0   | 0     | 0     | middle |
| 113 | PC-3p-206796_20             | CAGTGGCTCAGTTGGTGGA      | 0   | 7     | 12  | 9     | 0     | 0   | 0     | 0     | middle |
| 114 | PC-5p-276194_11             | TGGGAAAGTAGATGGTTGC      | 5   | 0     | 7   | 9     | 0     | 0   | 0     | 0     | low    |
| 115 | PC-3p-88143_70              | GAAACTGATGTTCTTGAGT      | 96  | 15    | 34  | 0     | 44    | 0   | 0     | 0     | middle |
| 116 | PC-5p-3037_1102             | GTGAAGGAAAGGTGAAAAGC     | 883 | 1,245 | 932 | 1,192 | 1,132 | 994 | 667   | 734   | high   |
| 117 | PC-3p-193454_23             | CTAGAGGCCTATGACGTCT      | 0   | 13    | 7   | 13    | 0     | 0   | 0     | 0     | middle |
| 118 | mmu-mir-6236-p3_1ss9AG      | CCATACCCGGCCGTCGCC       | 0   | 10    | 8   | 0     | 16    | 0   | 0     | 0     | middle |
| 119 | PC-5p-110195_53             | GCAGGAGCCCAAACCGGA       | 44  | 27    | 32  | 0     | 33    | 0   | 5     | 19    | middle |
| 120 | mmu-miR-30d-5p_R+2          | TGTAAACATCCCGACTGGAAGCT  | 200 | 135   | 142 | 153   | 130   | 271 | 349   | 528   | high   |
| 121 | PC-3p-187096_24             | AAAGGATGTGCTACTGCT       | 14  | 0     | 10  | 0     | 7     | 0   | 0     | 0     | middle |

|     |                             |                          |       |     |     |     |       |     |     |     |        |
|-----|-----------------------------|--------------------------|-------|-----|-----|-----|-------|-----|-----|-----|--------|
| 122 | mmu-miR-425-5p_R-1          | AATGACACGATCACTCCCCTTG   | 39    | 9   | 21  | 27  | 7     | 35  | 28  | 42  | middle |
| 123 | PC-3p-51786_122             | GAAGGAGTGACGGAGAAGG      | 15    | 10  | 21  | 29  | 13    | 6   | 12  | 12  | middle |
| 124 | PC-3p-217375_18             | AAATGGATAAGATAAAGTT      | 0     | 10  | 17  | 0   | 7     | 0   | 0   | 0   | middle |
| 125 | PC-5p-184656_25             | GGAGGTGCAAGTCAGCGGT      | 0     | 16  | 23  | 9   | 7     | 0   | 0   | 6   | middle |
| 126 | mmu-miR-128-3p              | TCACAGTGAACCGGTCTCTTT    | 8     | 0   | 0   | 0   | 0     | 4   | 6   | 11  | middle |
| 127 | eca-mir-8969-p5_1ss14GT     | GGTGGTTCAGTGGTAGAA       | 3     | 7   | 0   | 16  | 9     | 3   | 0   | 0   | middle |
| 128 | PC-5p-168283_29             | AGGCAGAGAGCCGAGATA       | 0     | 0   | 11  | 10  | 11    | 0   | 3   | 0   | middle |
| 129 | PC-3p-242901_15             | AGTCGCACTACTCGGACCA      | 0     | 15  | 7   | 0   | 7     | 0   | 0   | 0   | middle |
| 130 | PC-5p-109345_54             | GAGGTTAAGGGTAGAGGCC      | 5     | 13  | 8   | 26  | 14    | 8   | 2   | 7   | middle |
| 131 | PC-3p-176876_27             | ACACAGGGCTGTGCAAAGT      | 8     | 7   | 0   | 0   | 17    | 0   | 0   | 0   | middle |
| 132 | PC-5p-37319_165             | TTTCCGGTGGCCAGGCGGC      | 56    | 0   | 153 | 0   | 83    | 0   | 0   | 0   | middle |
| 133 | bta-miR-11980_R-2_1ss4CG    | AGGGAACGGGCTTGGCGG       | 0     | 4   | 0   | 8   | 7     | 0   | 0   | 1   | low    |
| 134 | PC-3p-199168_22             | AATAAGAAGGGAGAATGCC      | 4     | 0   | 0   | 10  | 14    | 0   | 0   | 0   | middle |
| 135 | PC-3p-157541_32             | GGGATAACAGGCTGATTC       | 29    | 0   | 8   | 0   | 20    | 0   | 0   | 0   | middle |
| 136 | PC-3p-170344_28             | CAGACCTGCAGCTAAGGC       | 14    | 0   | 7   | 0   | 11    | 0   | 2   | 0   | middle |
| 137 | mmu-let-7j_R-1_1ss8TG       | TGAGGTAGTAGTTTGTGCTGTTA  | 7     | 0   | 3   | 0   | 6     | 6   | 21  | 14  | middle |
| 138 | pal-miR-9995-3p             | ATCTCGGTGGAACCTCCA       | 6     | 0   | 11  | 14  | 0     | 0   | 2   | 0   | middle |
| 139 | mmu-miR-125b-5p             | TCCTGAGACCCTAACTTGTGA    | 40    | 20  | 19  | 14  | 30    | 33  | 78  | 89  | middle |
| 140 | mmu-let-7c-5p_1ss19GA       | TGAGGTAGTAGTTGTATAGTT    | 443   | 241 | 300 | 361 | 296   | 478 | 829 | 503 | high   |
| 141 | mmu-let-7a-5p               | TGAGGTAGTAGTTGTATAGTT    | 443   | 241 | 300 | 361 | 296   | 478 | 829 | 503 | high   |
| 142 | mmu-miR-378c_R+3_1ss21CG    | ACTGGACTTGGAGTCAGAAGGCTT | 2     | 0   | 0   | 0   | 0     | 6   | 4   | 1   | low    |
| 143 | PC-3p-47598_132             | GTAGGAAATTTGAGAGGAG      | 22    | 27  | 18  | 30  | 10    | 0   | 9   | 18  | middle |
| 144 | eca-mir-9112-p5_1ss3GT      | TGTGTTAGGAGCAGAGATG      | 2     | 5   | 13  | 6   | 0     | 0   | 0   | 3   | middle |
| 145 | PC-5p-8572_537              | TGGGGAGTTTGGCTGGGGC      | 608   | 43  | 66  | 72  | 251   | 18  | 0   | 9   | high   |
| 146 | PC-5p-212023_19             | GTAGATAGGGCATGGGTGC      | 0     | 0   | 0   | 9   | 0     | 6   | 4   | 5   | low    |
| 147 | PC-5p-262373_12             | GAGCAGAGTACTGTGAAGGAA    | 0     | 9   | 8   | 9   | 9     | 6   | 3   | 0   | low    |
| 148 | PC-5p-58070_109             | CAGGAAGAATTAGCAGACA      | 6     | 33  | 26  | 31  | 31    | 0   | 19  | 16  | middle |
| 149 | PC-5p-79138_79              | TTTAGGTGCAGCCTTGTGA      | 0     | 49  | 0   | 19  | 28    | 0   | 3   | 4   | middle |
| 150 | bta-miR-11987_L-1R-2_1ss8TA | GAGGAAACTCTGGTGGAG       | 0     | 4   | 0   | 6   | 4     | 0   | 0   | 1   | low    |
| 151 | mmu-miR-148b-3p             | TCAGTGCATCACAGAACTTTGT   | 21    | 7   | 0   | 0   | 0     | 15  | 94  | 65  | middle |
| 152 | PC-3p-42663_146             | TGAGGGAAAGGTGAAAAGA      | 4     | 34  | 19  | 36  | 23    | 9   | 11  | 18  | middle |
| 153 | mmu-miR-215-3p_R+1          | TCTGTCACTTCTGTAGGCCAATA  | 23    | 7   | 15  | 21  | 20    | 13  | 14  | 9   | middle |
| 154 | PC-3p-9235_509              | GTTCTTAGTTGGTGGAGC       | 265   | 27  | 17  | 53  | 112   | 6   | 8   | 30  | high   |
| 155 | mmu-miR-29b-3p              | TAGCACCATTTGAAATCAGTGTT  | 2     | 0   | 3   | 0   | 4     | 3   | 12  | 8   | middle |
| 156 | PC-3p-267694_12             | CATGAGCAGGATGAAGCAGA     | 5     | 0   | 10  | 0   | 16    | 0   | 2   | 0   | middle |
| 157 | mmu-mir-1983-p3             | GTTCGAGCCTCACCTGGA       | 10    | 0   | 0   | 7   | 20    | 0   | 0   | 3   | middle |
| 158 | mmu-miR-23b-3p_R+3          | ATCACATTGCCAGGGATTACCACT | 44    | 85  | 56  | 89  | 71    | 73  | 122 | 101 | middle |
| 159 | PC-3p-51291_123             | GCACTGGGAATCAAAGACT      | 6     | 18  | 45  | 10  | 26    | 0   | 10  | 13  | middle |
| 160 | PC-5p-239266_15             | ACACGTAGTCGGGTGAA        | 0     | 27  | 0   | 7   | 14    | 0   | 0   | 3   | middle |
| 161 | PC-5p-83829_74              | TGAGTGCAGAAGAGGGAA       | 28    | 18  | 8   | 39  | 14    | 0   | 10  | 18  | middle |
| 162 | mmu-mir-3106-p5_1ss1TC      | CTTAGAAGCAGCCATACA       | 6     | 62  | 95  | 20  | 56    | 11  | 18  | 32  | middle |
| 163 | PC-3p-80980_77              | TGAAGAGTTTGATCCTGGC      | 13    | 21  | 0   | 10  | 37    | 0   | 7   | 9   | middle |
| 164 | bta-miR-11987_L-1_1ss8TA    | GAGGAAACTCTGGTGGAGGT     | 0     | 4   | 10  | 16  | 9     | 0   | 3   | 5   | middle |
| 165 | mmu-let-7i-5p               | TGAGGTAGTAGTTTGTGCTGTT   | 118   | 36  | 57  | 56  | 30    | 99  | 327 | 168 | high   |
| 166 | mmu-let-7b-5p               | TGAGGTAGTAGTTTGTGCTGTT   | 499   | 237 | 290 | 322 | 250   | 497 | 367 | 387 | high   |
| 167 | PC-3p-143176_37             | GGTGTCTGAATGGGGAAAC      | 8     | 19  | 0   | 20  | 0     | 6   | 0   | 0   | middle |
| 168 | mmu-mir-6240-p3_1ss1GA      | AATGTGATTTCTGCCAGTGCT    | 4,547 | 591 | 396 | 897 | 1,837 | 691 | 196 | 305 | high   |
| 169 | PC-3p-49497_127             | TTTTGAAAGGAGGTAGCCC      | 19    | 28  | 14  | 20  | 24    | 12  | 0   | 19  | middle |
| 170 | PC-3p-97503_62              | CCATACATTCAAAGAGTG       | 9     | 68  | 29  | 9   | 9     | 16  | 0   | 7   | middle |
| 171 | PC-3p-193182_23             | GGTAGCTAAGTATGGAAGG      | 17    | 0   | 0   | 0   | 17    | 0   | 0   | 0   | middle |
| 172 | PC-5p-299786_10             | ATTAAGTTCAGTAGGTATT      | 0     | 7   | 0   | 7   | 0     | 0   | 0   | 0   | low    |
| 173 | ssc-mir-9820-p3_1ss12GC     | GTGAGGAGGAGCGAAGAAA      | 0     | 4   | 5   | 0   | 0     | 0   | 0   | 0   | low    |
| 174 | mmu-mir-711-p3_1ss4CT       | AGGTAAAGCTGGGGACCC       | 6     | 0   | 0   | 7   | 0     | 0   | 0   | 0   | low    |
| 175 | PC-3p-259493_13             | GAGCACCGTGACTAATGT       | 10    | 0   | 0   | 0   | 9     | 0   | 0   | 0   | low    |
| 176 | PC-3p-275999_11             | AAAGACTATGAGGTTGATA      | 0     | 7   | 0   | 0   | 9     | 0   | 0   | 0   | low    |
| 177 | PC-5p-252515_13             | GATTTAGTGGTTGGACATC      | 0     | 10  | 8   | 0   | 0     | 0   | 0   | 0   | middle |
| 178 | PC-5p-157207_32             | GAATGATGGAATTGGCAGA      | 4     | 15  | 0   | 16  | 0     | 0   | 0   | 4   | middle |
| 179 | PC-5p-283750_11             | GTTAAGGAACCTCGCAAGTTG    | 0     | 4   | 3   | 0   | 0     | 0   | 0   | 0   | low    |
| 180 | mml-mir-711-p5_1ss6CT       | GCAGGTAAAGCTGGGGACC      | 5     | 7   | 7   | 0   | 0     | 0   | 0   | 3   | low    |
| 181 | mmu-mir-8101-p3_1ss17GA     | TGGAGGAGCCGTCGAGAA       | 0     | 0   | 0   | 0   | 0     | 0   | 4   | 4   | low    |
| 182 | PC-5p-221088_18             | AAGGCAGAGTGGTAGAAGA      | 0     | 0   | 0   | 0   | 0     | 0   | 4   | 5   | low    |

|     |                             |                          |       |     |       |       |       |       |       |       |        |
|-----|-----------------------------|--------------------------|-------|-----|-------|-------|-------|-------|-------|-------|--------|
| 183 | PC-3p-277713_11             | AAGGTTAAGGGCTAAAGGC      | 10    | 0   | 0     | 7     | 0     | 0     | 0     | 0     | low    |
| 184 | cja-miR-155_R+1             | TTAATGCTAATCGTGATAGGGGT  | 0     | 0   | 0     | 0     | 0     | 0     | 58    | 63    | middle |
| 185 | mmu-miR-16-2-3p_R-1_1ss11TC | ACCAATATTACTGTGCTGCTT    | 0     | 0   | 0     | 0     | 0     | 0     | 3     | 3     | low    |
| 186 | PC-5p-246458_14             | GATACTGGCAAACCTAGAA      | 11    | 0   | 8     | 0     | 0     | 0     | 0     | 0     | middle |
| 187 | mmu-miR-365-3p              | TAATGCCCTAAAAATCCTTAT    | 0     | 0   | 0     | 0     | 0     | 0     | 14    | 13    | middle |
| 188 | mmu-miR-1839-5p_R+1         | AAGGTAGATAGAACAGGTCTTGT  | 0     | 0   | 0     | 0     | 0     | 0     | 3     | 4     | low    |
| 189 | PC-5p-42949_145             | CAGGTGGATGAGGAGAGAA      | 33    | 30  | 50    | 46    | 26    | 20    | 35    | 25    | middle |
| 190 | mmu-miR-191-5p_R-1          | CAACGGAAATCCCAAAGCAGCT   | 4,227 | 857 | 1,127 | 1,019 | 1,045 | 4,126 | 2,028 | 2,837 | high   |
| 191 | mmu-miR-26b-5p_R+1          | TTCAAGTAATTCAGGATAGGTT   | 167   | 112 | 103   | 156   | 117   | 156   | 415   | 264   | high   |
| 192 | mmu-miR-331-3p_R+1          | GCCCTGGGCTATCCTAGAAT     | 0     | 0   | 0     | 0     | 0     | 0     | 9     | 11    | middle |
| 193 | mmu-miR-1893_R-4_1ss12TA    | GGCGGGGGCGCAGGACGC       | 6     | 0   | 8     | 0     | 0     | 0     | 0     | 0     | low    |
| 194 | PC-5p-186306_24             | AAAAGAAGTGTGAGAGAC       | 10    | 0   | 0     | 0     | 7     | 0     | 0     | 0     | middle |
| 195 | PC-3p-27627_214             | AGGATGTTGGCCAGAAAGC      | 9     | 19  | 26    | 17    | 16    | 26    | 22    | 44    | middle |
| 196 | mmu-miR-23a-3p              | ATCACATTGCCAGGGATTTC     | 36    | 48  | 39    | 50    | 30    | 43    | 141   | 106   | middle |
| 197 | cpo-miR-193a-5p             | TGGGTCTTTGCGGGCAGATGA    | 0     | 0   | 0     | 0     | 0     | 8     | 6     | 0     | low    |
| 198 | PC-5p-255861_13             | GAATGGCATATGTGACTGC      | 6     | 0   | 0     | 0     | 9     | 0     | 0     | 0     | low    |
| 199 | mmu-miR-339-5p_R-3          | TCCCTGTCCCTCCAGGAGCTC    | 0     | 0   | 0     | 0     | 0     | 0     | 16    | 20    | middle |
| 200 | mmu-miR-342-3p              | TCTCACACAGAAATCGCACCCGT  | 33    | 0   | 0     | 0     | 0     | 0     | 418   | 470   | high   |
| 201 | mmu-miR-181c-5p_R+1         | AACATTCAACCTGTCGGTGAGTT  | 0     | 0   | 0     | 0     | 0     | 0     | 2     | 3     | low    |
| 202 | mmu-miR-335-5p              | TCAAGAGCAATAACGAAAAATGT  | 0     | 0   | 0     | 0     | 0     | 0     | 3     | 4     | low    |
| 203 | mmu-miR-378a-5p             | CTCCTGACTCCAGGTCTGTGT    | 0     | 0   | 0     | 0     | 0     | 0     | 4     | 5     | low    |
| 204 | ocu-miR-501-3p_R-1          | AATGCACCCGGGCAAGGATTC    | 0     | 0   | 0     | 0     | 0     | 0     | 2     | 3     | low    |
| 205 | mmu-miR-28a-3p_R+1_1ss17GC  | CACTAGATTGTGAGCTCCTGGAA  | 4     | 0   | 0     | 0     | 0     | 0     | 38    | 40    | middle |
| 206 | mmu-miR-30a-5p_R+2          | TGTAAACATCCTCGACTGGAAGCT | 120   | 118 | 145   | 172   | 127   | 154   | 787   | 532   | high   |
| 207 | rno-mir-711-p3_1ss4GT       | AGGTAAAGCTGGGGACCCT      | 0     | 7   | 4     | 0     | 0     | 0     | 0     | 0     | low    |
| 208 | mmu-miR-221-5p_R-4          | ACCTGGCATAACAATGTAGATTT  | 0     | 0   | 0     | 0     | 0     | 0     | 8     | 11    | middle |
| 209 | PC-5p-171502_28             | GTGTAGGTCACGGAAGTTT      | 43    | 0   | 0     | 0     | 26    | 0     | 0     | 0     | middle |
| 210 | PC-3p-293071_10             | CTTGAAGATGGAGAAGCAGGC    | 4     | 0   | 7     | 0     | 0     | 0     | 0     | 0     | low    |
| 211 | ssc-miR-1285_L+2R-4         | GCCTGGGCAACATAGCGAGACC   | 89    | 30  | 56    | 47    | 74    | 65    | 199   | 130   | high   |
| 212 | PC-5p-190700_23             | GCGGGGGACAATGTCTGGC      | 10    | 0   | 33    | 7     | 54    | 6     | 0     | 11    | middle |
| 213 | mmu-miR-6538_L-1            | GCGGGCTCCGGGGCGGCG       | 7     | 0   | 0     | 13    | 0     | 0     | 0     | 0     | middle |
| 214 | PC-5p-217353_18             | GGTGGGAGGCTATGAAGAA      | 0     | 0   | 0     | 0     | 0     | 0     | 5     | 4     | low    |
| 215 | PC-5p-99761_60              | CTTGGGGTTAAGGACTGC       | 15    | 0   | 56    | 0     | 9     | 0     | 0     | 0     | middle |
| 216 | mmu-let-7b-3p_1ss22CT       | CTATACACCTACTGCCTTCCT    | 0     | 0   | 0     | 0     | 0     | 0     | 3     | 4     | low    |
| 217 | mmu-miR-15a-5p_R-1          | TAGCAGCACATAATGGTTTGT    | 17    | 0   | 0     | 7     | 0     | 6     | 14    | 13    | middle |
| 218 | PC-3p-251705_14             | TAGAGAGAATGAGGTAGAT      | 6     | 10  | 0     | 0     | 0     | 0     | 0     | 0     | middle |
| 219 | PC-5p-7386_598              | GAACACGAGGAATTCTGAC      | 125   | 106 | 134   | 80    | 77    | 107   | 4     | 36    | middle |
| 220 | mmu-miR-21a-3p_R-1_1ss6GC   | CAACACCAGTCGATGGGCTGT    | 0     | 0   | 0     | 0     | 0     | 0     | 52    | 33    | middle |
| 221 | mmu-miR-195a-5p_R+1         | TAGCAGCACAGAAATATTGGCA   | 0     | 0   | 0     | 0     | 0     | 0     | 2     | 4     | low    |
| 222 | PC-5p-250485_14             | TTGATTTTGATTTCCAGTA      | 32    | 0   | 0     | 0     | 17    | 0     | 0     | 0     | middle |
| 223 | mmu-miR-361-3p_R-3          | TCCCCAGGTGTGATTCTGATT    | 4     | 0   | 0     | 0     | 0     | 0     | 18    | 23    | middle |
| 224 | hsa-miR-941                 | CACCCGGCTGTGTGCACATGTGC  | 0     | 0   | 0     | 0     | 0     | 0     | 32    | 20    | middle |
| 225 | hsa-miR-664a-3p             | TATTCATTTATCCCCAGCCTACA  | 0     | 0   | 0     | 0     | 0     | 0     | 6     | 4     | low    |
| 226 | mmu-miR-532-5p              | CATGCCCTGAGTGTAGGACCGT   | 0     | 0   | 0     | 0     | 0     | 0     | 33    | 20    | middle |
| 227 | mmu-miR-423-3p              | AGCTCGGTCTGAGGCCCTCAGT   | 56    | 12  | 8     | 9     | 13    | 46    | 121   | 295   | high   |
| 228 | mmu-miR-340-3p_R+1          | TCCGTCTCAGTTACTTTATAGCC  | 0     | 0   | 0     | 0     | 0     | 0     | 15    | 9     | middle |
| 229 | mmu-miR-6240_L-2R-6         | AAAGCATCGCGAAGGCC        | 79    | 226 | 180   | 464   | 204   | 182   | 50    | 143   | high   |
| 230 | PC-3p-276111_11             | AAGTGGGAAAGGATGTGACA     | 4     | 0   | 0     | 9     | 0     | 0     | 0     | 0     | low    |
| 231 | hsa-miR-511-5p_R+2          | GTGTCTTTTGCTCTGCAGTCAGT  | 0     | 0   | 0     | 0     | 0     | 0     | 6     | 4     | low    |
| 232 | cja-miR-589_R-1             | TGAGAACCACGCTCTGCTCTGA   | 0     | 0   | 0     | 0     | 0     | 0     | 4     | 6     | low    |
| 233 | mmu-miR-24-3p_R-2           | TGGCTCAGTTCAGCAGGAAC     | 26    | 39  | 46    | 52    | 33    | 42    | 239   | 140   | high   |
| 234 | PC-3p-205604_20             | AGTACCCGCGAGGAGAGAA      | 0     | 0   | 0     | 0     | 0     | 0     | 11    | 6     | middle |
| 235 | mmu-miR-17-5p               | CAAAGTGCTTACAGTGCAGGTAG  | 9     | 0   | 0     | 14    | 0     | 8     | 19    | 8     | middle |
| 236 | hsa-miR-4508_L+1R+1         | AGCGGGGCTGGGCGCGCGC      | 8     | 0   | 3     | 0     | 0     | 0     | 0     | 0     | low    |
| 237 | mmu-miR-93-5p_R-2           | CAAAGTGCTGTTCGTGCAGGT    | 48    | 10  | 25    | 27    | 33    | 79    | 39    | 37    | middle |
| 238 | hsa-miR-146b-3p             | GCCCTGTGGACTCAGTTCTGGT   | 0     | 0   | 0     | 0     | 0     | 0     | 25    | 46    | middle |
| 239 | chi-miR-1307-5p_R+4         | TCGACCCGACCTCGACCGGCT    | 0     | 0   | 0     | 0     | 0     | 0     | 1     | 2     | low    |
| 240 | mmu-miR-200c-3p             | TAATACTGCCGGGTAATGATGGA  | 95    | 195 | 135   | 245   | 142   | 184   | 305   | 200   | high   |
| 241 | ssc-miR-500-3p              | ATGCACCTGGGCAAGGATTCT    | 0     | 0   | 0     | 0     | 0     | 0     | 37    | 20    | middle |
| 242 | cja-miR-502b_R-2            | ATGCACCTGGGCAAGGATTCT    | 0     | 0   | 0     | 0     | 0     | 0     | 37    | 20    | middle |
| 243 | mmu-miR-146b-5p_R+2         | TGAGAACTGAATCCATAGGCTGT  | 257   | 31  | 28    | 0     | 20    | 13    | 5,192 | 2,911 | high   |

|     |                          |                          |        |       |       |       |       |       |       |       |        |
|-----|--------------------------|--------------------------|--------|-------|-------|-------|-------|-------|-------|-------|--------|
| 244 | mmu-let-7g-5p            | TGAGGTAGTAGTTTGTACAGTT   | 267    | 177   | 180   | 222   | 164   | 306   | 1,076 | 462   | high   |
| 245 | PC-5p-166051_30          | GCAGCTGCTCCGTTGAGCT      | 23     | 0     | 0     | 0     | 10    | 0     | 0     | 0     | middle |
| 246 | oan-miR-1386_L+4         | TCGGCTCCTGGCTGGCTCGCCA   | 4      | 0     | 0     | 0     | 0     | 0     | 8     | 9     | low    |
| 247 | PC-3p-335837_7           | ATGGGAGTCGGGAGTGCC       | 4      | 0     | 10    | 0     | 0     | 0     | 0     | 0     | low    |
| 248 | PC-5p-7639_584           | AGGTCCAGACATAGCAAGG      | 928    | 0     | 0     | 0     | 386   | 0     | 0     | 0     | high   |
| 249 | mmu-miR-200a-3p_R+1      | TAACACTGTCTGGTAACGATGTT  | 630    | 850   | 709   | 1,155 | 748   | 845   | 459   | 491   | high   |
| 250 | mmu-miR-326-3p           | CCTCTGGGCCCTTCCCTCCAGT   | 0      | 0     | 0     | 0     | 0     | 0     | 6     | 3     | low    |
| 251 | mmu-miR-146a-5p          | TGAGAAGTGAATCCATGGGTT    | 54     | 62    | 172   | 160   | 44    | 10    | 1,044 | 954   | high   |
| 252 | PC-3p-276641_11          | CTTTTAAGTGTGGGTGAAA      | 0      | 0     | 0     | 7     | 0     | 6     | 2     | 4     | low    |
| 253 | PC-3p-105637_56          | ATGCACAGACAACCTAGGAT     | 0      | 7     | 28    | 37    | 30    | 15    | 4     | 11    | middle |
| 254 | PC-5p-140741_38          | AGGACGGTGGTCATGGAA       | 47     | 0     | 0     | 0     | 19    | 0     | 0     | 0     | middle |
| 255 | PC-5p-198429_22          | GCTATGGCTCAGCAGGTAGA     | 0      | 9     | 0     | 23    | 0     | 0     | 0     | 0     | middle |
| 256 | cpo-miR-769-5p           | TGAGACCTCTGGGTTCTGAGCT   | 0      | 0     | 0     | 0     | 0     | 0     | 8     | 4     | low    |
| 257 | PC-5p-1729_1595          | GGAACAATGTAGGCAAGGG      | 2,719  | 0     | 7     | 0     | 1,034 | 0     | 0     | 0     | high   |
| 258 | PC-5p-131618_42          | ATCGAAGCAGTGAAGTGAA      | 6      | 0     | 0     | 0     | 7     | 6     | 13    | 4     | middle |
| 259 | cfa-miR-1301_R-1         | TTGCAGCTGCCTGGGAGTGACTTC | 0      | 0     | 0     | 0     | 0     | 0     | 6     | 12    | middle |
| 260 | eca-mir-9112-p5_1ss2GT   | GTGTTAGGAGCAGAGATG       | 5      | 19    | 33    | 31    | 16    | 3     | 5     | 22    | middle |
| 261 | PC-3p-97329_62           | GAATTAAGTAGCGAAGC        | 70     | 0     | 12    | 0     | 10    | 0     | 0     | 0     | middle |
| 262 | PC-3p-166226_29          | GAACCCGAAAACCTGTCT       | 19     | 24    | 0     | 0     | 0     | 0     | 3     | 0     | middle |
| 263 | PC-5p-18541_296          | GGTGTCCCTAAGATGAGCT      | 449    | 0     | 0     | 0     | 167   | 0     | 0     | 0     | high   |
| 264 | PC-5p-2906_1133          | GTTAAGAAGAGAGAATGCC      | 388    | 179   | 301   | 208   | 253   | 260   | 187   | 71    | high   |
| 265 | PC-3p-290201_10          | CGTGGATCGCCTCAGCTGC      | 4      | 7     | 7     | 0     | 7     | 6     | 0     | 0     | low    |
| 266 | PC-5p-28815_206          | GGGAGGCGAAGAGATGGC       | 26     | 48    | 116   | 16    | 38    | 13    | 38    | 19    | middle |
| 267 | PC-3p-120714_47          | AAGTGGGCCATTTTTGGTA      | 27     | 0     | 0     | 0     | 9     | 0     | 0     | 0     | middle |
| 268 | PC-5p-145977_36          | CTGGAAGGTTAAGGAGAGA      | 24     | 0     | 8     | 0     | 0     | 0     | 0     | 0     | middle |
| 269 | PC-3p-21055_268          | GATGGTCTTGCGGATGCT       | 218    | 0     | 0     | 0     | 73    | 0     | 0     | 0     | high   |
| 270 | PC-5p-305844_9           | AGCATAGCTGTGGGACCC       | 4      | 0     | 12    | 0     | 0     | 0     | 0     | 0     | middle |
| 271 | mmu-miR-34c-5p           | AGGCAGTGTAGTTAGCTGATTGC  | 5      | 0     | 0     | 0     | 0     | 0     | 17    | 34    | middle |
| 272 | PC-3p-103430_58          | GATAGGTGGGAGGCTTGGA      | 10     | 0     | 14    | 11    | 7     | 0     | 3     | 9     | middle |
| 273 | cfa-miR-660_R+1          | TACCCATTGCATATCGGAGTTGT  | 0      | 0     | 0     | 0     | 0     | 0     | 16    | 6     | middle |
| 274 | PC-3p-175446_27          | GATGGACAACCTGGTAGATA     | 0      | 0     | 0     | 10    | 0     | 15    | 0     | 20    | middle |
| 275 | mmu-mir-6236-p5          | CACCTGCCGAATCAACTAGCC    | 10,304 | 315   | 475   | 563   | 2,658 | 434   | 82    | 312   | high   |
| 276 | PC-5p-184447_25          | TTTGAGATTGGTAGGGGAG      | 27     | 0     | 0     | 0     | 9     | 0     | 0     | 0     | middle |
| 277 | PC-3p-7629_584           | CCAGCTTGAGAATTTGGC       | 414    | 0     | 0     | 9     | 115   | 0     | 0     | 0     | high   |
| 278 | bta-miR-374a_R-1         | TTATAATACAACCTGATAAGT    | 6      | 0     | 0     | 0     | 0     | 0     | 13    | 9     | middle |
| 279 | chi-miR-374a-5p          | TTATAATACAACCTGATAAGT    | 6      | 0     | 0     | 0     | 0     | 0     | 13    | 9     | middle |
| 280 | mmu-miR-106b-5p          | TAAAGTGTGACAGTGCAGAT     | 16     | 13    | 8     | 16    | 16    | 0     | 12    | 12    | middle |
| 281 | PC-3p-83099_75           | CAAAGTGGCGCAGTTGGTAGC    | 5      | 36    | 26    | 24    | 26    | 25    | 0     | 10    | middle |
| 282 | PC-5p-122085_47          | AGCAGGAGAGCTGGGCACT      | 0      | 7     | 11    | 14    | 10    | 7     | 0     | 6     | middle |
| 283 | PC-3p-77658_81           | GTCAGGTGGGCAAGTTGA       | 0      | 21    | 14    | 36    | 11    | 8     | 0     | 14    | middle |
| 284 | PC-3p-238558_15          | AGTGAATCTTATGGAGGA       | 4      | 0     | 14    | 0     | 0     | 0     | 0     | 0     | middle |
| 285 | mmu-miR-181a-1-3p        | ACCATCGACCGTTGATGTACC    | 0      | 0     | 0     | 0     | 0     | 0     | 2     | 6     | low    |
| 286 | PC-5p-104544_57          | AGGTAGACAGGAAGAGGATT     | 37     | 37    | 18    | 0     | 10    | 13    | 9     | 9     | middle |
| 287 | PC-5p-114836_51          | GAAGAAGCATTGTTAAGGA      | 27     | 0     | 22    | 0     | 20    | 9     | 6     | 4     | middle |
| 288 | mmu-miR-28a-5p_R-1       | AAGGAGCTCACAGTCTATTGA    | 0      | 0     | 0     | 0     | 0     | 0     | 20    | 8     | middle |
| 289 | mmu-miR-340-5p           | TTATAAAGCAATGAGACTGATT   | 18     | 0     | 11    | 13    | 11    | 6     | 37    | 42    | middle |
| 290 | mmu-miR-181b-5p_R-1      | AACATTTCATTGCTGTCGGTGGGT | 2      | 0     | 0     | 0     | 0     | 0     | 4     | 8     | low    |
| 291 | hsa-miR-141-3p_R+2       | TAACACTGTCTGGTAAAGATGGCT | 4      | 19    | 7     | 7     | 7     | 10    | 0     | 0     | middle |
| 292 | mmu-miR-98-5p            | TGAGGTAGTAAGTTGTATTGTT   | 13     | 0     | 11    | 17    | 11    | 16    | 94    | 32    | middle |
| 293 | bta-miR-197              | TTACCACCTTCTCCACCCAGC    | 0      | 0     | 0     | 0     | 0     | 0     | 12    | 34    | middle |
| 294 | mmu-miR-29a-3p_R-1       | TAGCACCATCTGAAATCGGTT    | 61     | 139   | 155   | 111   | 125   | 71    | 371   | 533   | high   |
| 295 | mmu-miR-21a-5p           | TAGCTTATCAGACTGATGTTGA   | 840    | 1,125 | 1,031 | 1,448 | 896   | 1,195 | 6,649 | 2,783 | high   |
| 296 | PC-3p-172744_28          | GGTGTGGAGCCGAAGGGA       | 0      | 0     | 41    | 0     | 17    | 0     | 4     | 0     | middle |
| 297 | PC-5p-21449_264          | GAACAGTCAACTCAGAACT      | 821    | 0     | 0     | 0     | 202   | 0     | 0     | 0     | high   |
| 298 | mmu-let-7c-5p            | TGAGGTAGTAGTTGTATGGTT    | 102    | 137   | 179   | 190   | 174   | 156   | 99    | 127   | high   |
| 299 | PC-5p-83316_75           | AACAGAGTGAGGCGAACC       | 10     | 39    | 0     | 62    | 19    | 26    | 0     | 0     | middle |
| 300 | bta-miR-11987_L-2_1ss8TA | AGGAAACTCTGGTGGAGGT      | 0      | 7     | 0     | 10    | 0     | 0     | 0     | 2     | middle |
| 301 | mmu-let-7d-5p            | AGAGGTAGTAGTTGCATAGTT    | 147    | 121   | 149   | 210   | 152   | 151   | 236   | 193   | high   |
| 302 | PC-5p-98309_62           | GGAAGGTGAGGTATATGGG      | 12     | 13    | 11    | 14    | 10    | 15    | 0     | 0     | middle |
| 303 | mmu-miR-27a-3p           | TTACAGTGGCTAAGTCCGC      | 151    | 233   | 207   | 182   | 182   | 137   | 442   | 546   | high   |
| 304 | mmu-miR-181a-5p          | AACATTCAACGCTGTCGGTGAGT  | 22     | 14    | 19    | 19    | 13    | 11    | 82    | 184   | high   |



|     |                 |                         |    |    |    |   |    |    |   |   |        |
|-----|-----------------|-------------------------|----|----|----|---|----|----|---|---|--------|
| 366 | PC-5p-317701_8  | AGGACACTTGGAGCTAGCT     | 6  | 0  | 0  | 0 | 0  | 0  | 0 | 0 | low    |
| 367 | PC-3p-374647_6  | ATCTGAGAGGAGCTGTCT      | 5  | 0  | 0  | 0 | 0  | 0  | 0 | 0 | low    |
| 368 | PC-5p-295737_10 | GGACGCCAGTTCCTGAGGA     | 8  | 0  | 0  | 0 | 0  | 0  | 0 | 0 | low    |
| 369 | PC-5p-280213_11 | TCAAAGTCTTTGGGTCC       | 9  | 0  | 0  | 0 | 0  | 0  | 0 | 0 | low    |
| 370 | PC-3p-293682_10 | AAGGAGGTAGGGGTGCAGA     | 8  | 0  | 0  | 0 | 0  | 0  | 0 | 0 | low    |
| 371 | PC-3p-399874_5  | AAAACGTGTAGACTTGAGT     | 4  | 0  | 0  | 0 | 0  | 0  | 0 | 0 | low    |
| 372 | PC-5p-351861_6  | AGGCTGAGGACTCTGGCGA     | 5  | 0  | 0  | 0 | 0  | 0  | 0 | 0 | low    |
| 373 | PC-5p-225081_17 | TTCCGCCAGGAGCACAGCC     | 14 | 0  | 0  | 0 | 0  | 0  | 0 | 0 | middle |
| 374 | PC-3p-308773_9  | TTTAGGAGTAAGAGGTAGA     | 7  | 0  | 0  | 0 | 0  | 0  | 0 | 0 | low    |
| 375 | PC-3p-310528_8  | ACATGACCGAAGAATAAAC     | 6  | 0  | 0  | 0 | 0  | 0  | 0 | 0 | low    |
| 376 | PC-3p-341346_7  | GCCTCAAGAATAGATTCC      | 6  | 0  | 0  | 0 | 0  | 0  | 0 | 0 | low    |
| 377 | PC-3p-397370_5  | CCCATGTCCAGGATGAAGT     | 4  | 0  | 0  | 0 | 0  | 0  | 0 | 0 | low    |
| 378 | PC-3p-366779_6  | GCTAGCCTTGAACAAGACA     | 5  | 0  | 0  | 0 | 0  | 0  | 0 | 0 | low    |
| 379 | PC-5p-326877_7  | AAGTATGGAGAGTTTGATC     | 0  | 10 | 0  | 0 | 0  | 0  | 0 | 0 | middle |
| 380 | PC-5p-357506_6  | ACTGAATATGACATCTGGGC    | 0  | 9  | 0  | 0 | 0  | 0  | 0 | 0 | low    |
| 381 | PC-5p-294905_10 | CTGGCGTAAAGGGAGTGT      | 12 | 0  | 0  | 0 | 0  | 0  | 0 | 0 | middle |
| 382 | PC-5p-409428_5  | ACAAACAGGAGGATATAA      | 4  | 0  | 0  | 0 | 0  | 0  | 0 | 0 | low    |
| 383 | PC-3p-404592_5  | AGGAGGAGAAAACAAAAGTGA   | 4  | 0  | 0  | 0 | 0  | 0  | 0 | 0 | low    |
| 384 | PC-3p-222543_17 | CTTAAAGAGAATGAGGTAGA    | 14 | 0  | 0  | 0 | 0  | 0  | 0 | 0 | middle |
| 385 | PC-5p-382494_6  | TAAAATCTATACCGAAGCT     | 5  | 0  | 0  | 0 | 0  | 0  | 0 | 0 | low    |
| 386 | PC-5p-338454_7  | GGAAACGGGCTTGGCAGAA     | 6  | 0  | 0  | 0 | 0  | 0  | 0 | 0 | low    |
| 387 | PC-5p-219216_18 | TGAGAGAACTATGTTGAA      | 24 | 0  | 0  | 0 | 0  | 0  | 0 | 0 | middle |
| 388 | PC-3p-375076_6  | AGGTTGGGTGTGAAGCAC      | 5  | 0  | 0  | 0 | 0  | 0  | 0 | 0 | low    |
| 389 | PC-5p-380828_6  | GCACGAGGGTCCCGGCCCC     | 5  | 0  | 0  | 0 | 0  | 0  | 0 | 0 | low    |
| 390 | PC-5p-414110_5  | GCATTTGAAACTGTTGATC     | 4  | 0  | 0  | 0 | 0  | 0  | 0 | 0 | low    |
| 391 | PC-3p-275678_11 | AAGTCAGATGTGAAATCCAC    | 9  | 0  | 0  | 0 | 0  | 0  | 0 | 0 | low    |
| 392 | PC-5p-462431_5  | CTAAAGGAGAAGAATCCAG     | 4  | 0  | 0  | 0 | 0  | 0  | 0 | 0 | low    |
| 393 | PC-5p-357292_6  | GAGTAGCCCAAACCGGAGAT    | 5  | 0  | 0  | 0 | 0  | 0  | 0 | 0 | low    |
| 394 | PC-5p-404698_5  | CCATGAGCAGGCTGAAGCA     | 4  | 0  | 0  | 0 | 0  | 0  | 0 | 0 | low    |
| 395 | PC-5p-437097_5  | CCTTGAAATTAGTAGTTTTC    | 0  | 7  | 0  | 0 | 0  | 0  | 0 | 0 | low    |
| 396 | PC-3p-356884_6  | AGCAGAAAAGGTTTGGGAAAGC  | 5  | 0  | 0  | 0 | 0  | 0  | 0 | 0 | low    |
| 397 | PC-3p-305892_9  | ATGGGGTGCCGGGGAGGGT     | 7  | 0  | 0  | 0 | 0  | 0  | 0 | 0 | low    |
| 398 | PC-3p-459005_5  | CCAGATAAGAAAAAGTTA      | 4  | 0  | 0  | 0 | 0  | 0  | 0 | 0 | low    |
| 399 | PC-3p-225944_17 | GCTCTGAGGGCTGGGCACG     | 7  | 0  | 0  | 0 | 0  | 0  | 0 | 0 | low    |
| 400 | PC-5p-315146_8  | GGGAGCAAGCTGTGTCAC      | 6  | 0  | 0  | 0 | 0  | 0  | 0 | 0 | low    |
| 401 | PC-5p-274645_11 | AGCATGGGATAACATCACA     | 9  | 0  | 0  | 0 | 0  | 0  | 0 | 0 | low    |
| 402 | PC-3p-434894_5  | GTGGGCAGGTTGAAGCAGGA    | 4  | 0  | 0  | 0 | 0  | 0  | 0 | 0 | low    |
| 403 | PC-3p-260867_13 | GGTCCCGGCCCAAACCTCGT    | 24 | 0  | 0  | 0 | 0  | 0  | 0 | 0 | middle |
| 404 | PC-5p-403915_5  | AGCGAAAACAGAAGGAGCA     | 4  | 0  | 0  | 0 | 0  | 0  | 0 | 0 | low    |
| 405 | PC-5p-309104_9  | ATGTTTTTGGTAGAGGAGC     | 7  | 0  | 0  | 0 | 0  | 0  | 0 | 0 | low    |
| 406 | PC-5p-389270_5  | TATTCAGCTGACTGGTACT     | 4  | 0  | 0  | 0 | 0  | 0  | 0 | 0 | low    |
| 407 | PC-5p-259602_13 | TAGGTGACAAATGTGTAGGA    | 19 | 0  | 0  | 0 | 0  | 0  | 0 | 0 | middle |
| 408 | PC-5p-372871_6  | AAGGCAGCTCTCTTGGTCT     | 5  | 0  | 0  | 0 | 0  | 0  | 0 | 0 | low    |
| 409 | PC-5p-435394_5  | AGACCTCAGCCTAACTAGC     | 4  | 0  | 0  | 0 | 0  | 0  | 0 | 0 | low    |
| 410 | PC-5p-365834_6  | GGAATAATGTAGGCAAGGG     | 5  | 0  | 0  | 0 | 0  | 0  | 0 | 0 | low    |
| 411 | PC-3p-249521_14 | ATTCTCAAGAGACCCTGC      | 11 | 0  | 0  | 0 | 0  | 0  | 0 | 0 | middle |
| 412 | PC-3p-334635_7  | GCACGAGATAAGTTAGGTA     | 6  | 0  | 0  | 0 | 0  | 0  | 0 | 0 | low    |
| 413 | PC-5p-239424_15 | GTTTGATTTGATTCCAGT      | 12 | 0  | 0  | 0 | 0  | 0  | 0 | 0 | middle |
| 414 | PC-5p-379179_6  | GAAGACAGCGAGAAAGATT     | 0  | 9  | 0  | 0 | 0  | 0  | 0 | 0 | low    |
| 415 | PC-3p-362836_6  | CTGAATACTAGATATGACC     | 5  | 0  | 0  | 0 | 0  | 0  | 0 | 0 | low    |
| 416 | PC-3p-324291_7  | GGGAACTCAGGAGAGACTG     | 6  | 0  | 0  | 0 | 0  | 0  | 0 | 0 | low    |
| 417 | PC-3p-271304_12 | CTACACTGATGTATTCAAC     | 10 | 0  | 0  | 0 | 0  | 0  | 0 | 0 | low    |
| 418 | PC-5p-262310_12 | GGAGGGATAAGAAGAGAGAAT   | 23 | 0  | 0  | 0 | 0  | 0  | 0 | 0 | middle |
| 419 | PC-5p-350850_6  | GAAGGCGGGCTAGTGACT      | 5  | 0  | 0  | 0 | 0  | 0  | 0 | 0 | low    |
| 420 | PC-3p-385089_6  | GCGCACCTGGAAATGGCT      | 5  | 0  | 0  | 0 | 0  | 0  | 0 | 0 | low    |
| 421 | PC-5p-428556_5  | CAGCAGTTGGACATGGGTGA    | 4  | 0  | 0  | 0 | 0  | 0  | 0 | 0 | low    |
| 422 | PC-3p-455819_5  | CAGAGCAGCTGTTCCAGTT     | 4  | 0  | 0  | 0 | 0  | 0  | 0 | 0 | low    |
| 423 | PC-5p-358807_6  | AAGAGAAGCAGGTAGATAG     | 5  | 0  | 0  | 0 | 0  | 0  | 0 | 0 | low    |
| 424 | PC-5p-124898_45 | GGCTGGAGAGGGTGAAGC      | 0  | 0  | 32 | 0 | 11 | 0  | 3 | 4 | middle |
| 425 | PC-5p-119386_48 | AGGAAGCCAGATACCCGTC     | 10 | 0  | 14 | 0 | 9  | 0  | 5 | 5 | middle |
| 426 | mmu-miR-144-5p  | GGATATCATCATATACTGTAAGT | 18 | 0  | 0  | 0 | 0  | 19 | 6 | 4 | middle |

|     |                         |                          |    |    |    |     |    |    |    |     |        |
|-----|-------------------------|--------------------------|----|----|----|-----|----|----|----|-----|--------|
| 427 | mmu-miR-375-3p          | TTTGTTCGTTTCGGCTCGCGTGA  | 14 | 15 | 18 | 29  | 11 | 16 | 12 | 15  | middle |
| 428 | PC-5p-14992_350         | AGTGGATACCAAAGGACAGT     | 19 | 40 | 67 | 93  | 58 | 48 | 12 | 54  | middle |
| 429 | PC-5p-103999_57         | CGAAACAGGCAGGCTGGCC      | 0  | 0  | 0  | 7   | 0  | 0  | 4  | 25  | middle |
| 430 | mmu-miR-19b-3p_R-2      | TGTGCAAATCCATGCAAAACT    | 4  | 6  | 4  | 0   | 4  | 6  | 2  | 11  | middle |
| 431 | mmu-miR-744-5p_R-1      | TGCGGGGCTAGGGCTAACAGC    | 4  | 0  | 0  | 0   | 0  | 0  | 2  | 13  | middle |
| 432 | mmu-miR-29c-3p_R-1      | TAGCACCATTTGAAATCGGTT    | 0  | 4  | 3  | 4   | 0  | 0  | 6  | 11  | middle |
| 433 | mmu-miR-652-3p_R+1      | AATGGCGCCACTAGGGTTGTGT   | 22 | 9  | 23 | 27  | 9  | 19 | 18 | 45  | middle |
| 434 | PC-3p-50169_125         | TGAGTATCGGAGAGGCAGG      | 4  | 24 | 10 | 53  | 20 | 15 | 4  | 21  | middle |
| 435 | mmu-miR-142a-3p_R-1     | TGTAGTGTTCCTACTTTATGG    | 6  | 0  | 0  | 0   | 0  | 0  | 8  | 4   | low    |
| 436 | PC-3p-123554_46         | GCAGGCAAATCCACCTCTC      | 5  | 7  | 0  | 13  | 9  | 0  | 2  | 9   | middle |
| 437 | PC-5p-209428_20         | GGGAAGGCTGGCCAGAGAGG     | 0  | 0  | 7  | 0   | 0  | 7  | 4  | 0   | low    |
| 438 | mmu-miR-150-5p          | TCTCCCAACCCTTGTACCAGTG   | 13 | 0  | 0  | 0   | 0  | 0  | 10 | 209 | high   |
| 439 | PC-5p-16619_324         | GTTAGCTTGGAAGCAGCT       | 14 | 83 | 67 | 125 | 94 | 31 | 40 | 90  | middle |
| 440 | PC-5p-160015_31         | TTGGAGAGTACGAGGTGGA      | 6  | 0  | 0  | 66  | 10 | 13 | 0  | 0   | middle |
| 441 | PC-5p-161240_31         | TAGGATATTTGAAAGGAGC      | 0  | 0  | 12 | 0   | 0  | 7  | 5  | 3   | middle |
| 442 | PC-5p-83409_74          | GTGGGATTCCTGTACTACA      | 7  | 9  | 0  | 16  | 7  | 17 | 8  | 8   | middle |
| 443 | mmu-let-7a-1-3p_1ss22CT | CTATACAATCTACTGTCTTTCT   | 0  | 0  | 0  | 0   | 0  | 0  | 6  | 0   | low    |
| 444 | mmu-miR-19a-3p_R-2      | TGTGCAAATCTATGCAAAACT    | 0  | 0  | 0  | 0   | 0  | 6  | 0  | 0   | low    |
| 445 | mmu-miR-22-5p           | AGTTCTTCAGTGGCAAGCTTTA   | 0  | 0  | 0  | 0   | 0  | 0  | 5  | 0   | low    |
| 446 | mmu-miR-30c-2-3p        | CTGGGAGAAGGCTGTTACTCT    | 0  | 0  | 0  | 0   | 0  | 0  | 4  | 0   | low    |
| 447 | mmu-miR-130b-5p         | ACTCTTCCCTGTTGCACTACT    | 0  | 0  | 0  | 0   | 0  | 7  | 0  | 0   | low    |
| 448 | mmu-miR-140-5p          | CAGTGGTTTTACCCTATGGTAG   | 0  | 0  | 0  | 0   | 0  | 0  | 3  | 0   | low    |
| 449 | mmu-miR-147-5p_R-2      | TGGAAACATTTCTGCACAAACT   | 0  | 0  | 0  | 0   | 0  | 0  | 2  | 0   | low    |
| 450 | mmu-miR-148b-5p_R-1     | GAAGTTCCTGTTATACACTCAGGC | 0  | 0  | 0  | 0   | 0  | 0  | 2  | 0   | low    |
| 451 | mmu-miR-223-5p          | CGTGTATTTGACAAGCTGAGTTG  | 0  | 0  | 0  | 0   | 0  | 0  | 4  | 0   | low    |
| 452 | mmu-mir-466k-p3_1ss3GT  | GTTTGTGAGTATGTGAAT       | 0  | 0  | 0  | 0   | 0  | 0  | 3  | 0   | low    |
| 453 | mmu-miR-542-3p_R+2      | TGTGACAGATTGATAACTGAAAGT | 0  | 0  | 0  | 0   | 0  | 0  | 2  | 0   | low    |
| 454 | mmu-miR-708-5p          | AAGGAGCTTACAATCTAGCTGGG  | 0  | 0  | 0  | 0   | 0  | 0  | 2  | 0   | low    |
| 455 | rno-miR-224-5p          | CAAGTCACTAGTGGTCCGTTT    | 0  | 0  | 0  | 0   | 0  | 0  | 2  | 0   | low    |
| 456 | cgr-miR-362_R-2         | AATCCTTGGAACCTAGGTGTGAGT | 0  | 0  | 0  | 0   | 0  | 0  | 3  | 0   | low    |
| 457 | rno-miR-505-3p_R+3      | GTCAACACTTGCTGGTTTCCTCT  | 0  | 0  | 0  | 0   | 0  | 0  | 8  | 0   | low    |
| 458 | bta-mir-3533-p5_1ss15CT | ATGGAGTCCTGTGGTATCC      | 0  | 0  | 0  | 0   | 0  | 6  | 0  | 0   | low    |
| 459 | bta-miR-146a_R-3        | TGAGAAGTGAATCCATAGGT     | 0  | 0  | 0  | 0   | 0  | 0  | 5  | 0   | low    |
| 460 | bta-miR-339a_R+1        | TCCCTGTCCCTCAGGAGCTCACT  | 0  | 0  | 0  | 0   | 0  | 0  | 4  | 0   | low    |
| 461 | dno-miR-374a-3p         | CTTATCAGATTGTATTGTAATT   | 0  | 0  | 0  | 0   | 0  | 0  | 3  | 0   | low    |
| 462 | hsa-miR-511-5p_R-1      | GTGTCTTTTGCTCTGCAGTC     | 0  | 0  | 0  | 0   | 0  | 0  | 2  | 0   | low    |
| 463 | mml-miR-1271-5p         | CTTGGCACCTAGCAAGCACTCA   | 0  | 0  | 0  | 0   | 0  | 0  | 2  | 0   | low    |
| 464 | pal-miR-9993b-3p        | ATCTCGCTGGGGCCTCCA       | 0  | 0  | 0  | 0   | 0  | 0  | 2  | 0   | low    |
| 465 | ssc-miR-24-1-5p         | GTGCCTACTGAGCTGAAACACAGT | 0  | 0  | 0  | 0   | 0  | 0  | 3  | 0   | low    |
| 466 | cja-miR-345_R+2         | GCTGACTCCTAGTCCAGGGCTC   | 0  | 0  | 0  | 0   | 0  | 0  | 3  | 0   | low    |
| 467 | cfa-miR-590             | TAATTTTATGTATAAGCTAGT    | 0  | 0  | 0  | 0   | 0  | 0  | 1  | 0   | low    |
| 468 | eca-miR-590-3p          | TAATTTTATGTATAAGCTAGT    | 0  | 0  | 0  | 0   | 0  | 0  | 1  | 0   | low    |
| 469 | bta-miR-1246_L+1        | AAATGGATTTTGGAGCAGG      | 0  | 0  | 0  | 0   | 0  | 0  | 3  | 0   | low    |
| 470 | hsa-miR-7977_1ss6AG     | TTCCCGGCCAACGCACCA       | 0  | 0  | 0  | 0   | 0  | 0  | 4  | 0   | low    |
| 471 | PC-5p-374535_6          | TACAAAGAGCATATAGGGG      | 0  | 0  | 0  | 0   | 0  | 3  | 0  | 0   | low    |
| 472 | PC-3p-335774_7          | AATTGATGGCCTTGGCAGA      | 0  | 0  | 0  | 0   | 0  | 0  | 3  | 0   | low    |
| 473 | PC-3p-426196_5          | GCAAGTGCGGGGTAGGGGA      | 0  | 0  | 0  | 0   | 0  | 6  | 0  | 0   | low    |
| 474 | PC-3p-454111_5          | GGAGTGCATTTGGAAGTGT      | 0  | 0  | 0  | 0   | 0  | 6  | 0  | 0   | low    |
| 475 | PC-3p-350003_6          | GGAGGATATTTAAGGGGAGC     | 0  | 0  | 0  | 0   | 0  | 7  | 0  | 0   | low    |
| 476 | PC-3p-414155_5          | AGCAAGCCAAAGGGACCTG      | 0  | 0  | 0  | 0   | 0  | 6  | 0  | 0   | low    |
| 477 | PC-3p-301012_9          | GGCCGCAGAGGGTGAAAGC      | 0  | 0  | 0  | 0   | 0  | 10 | 0  | 0   | middle |
| 478 | PC-5p-389468_5          | TCAAATGTTAAGACTTACC      | 0  | 0  | 0  | 0   | 0  | 6  | 0  | 0   | low    |
| 479 | PC-5p-400136_5          | CAGCTAAGGTCCTAAGTG       | 0  | 0  | 0  | 0   | 0  | 6  | 0  | 0   | low    |
| 480 | PC-5p-342950_7          | AAGTGAATGGCTAAGAGATT     | 0  | 0  | 0  | 0   | 0  | 0  | 3  | 0   | low    |
| 481 | PC-3p-402243_5          | TCACCAAAGAATGAAATGTA     | 0  | 0  | 0  | 0   | 0  | 6  | 0  | 0   | low    |
| 482 | PC-5p-303205_9          | AGGGAAGCCAGTGAATGAC      | 0  | 0  | 0  | 0   | 0  | 0  | 4  | 0   | low    |
| 483 | PC-5p-332195_7          | GCAGAATGGTTTTGGGAAAG     | 0  | 0  | 0  | 0   | 0  | 0  | 3  | 0   | low    |
| 484 | PC-5p-400238_5          | TAGGAGGGAGGCTAAGAAGC     | 0  | 0  | 0  | 0   | 0  | 6  | 0  | 0   | low    |
| 485 | PC-5p-390489_5          | GAAGCATACGAATCTGCACC     | 0  | 0  | 0  | 0   | 0  | 6  | 0  | 0   | low    |
| 486 | PC-5p-295224_10         | GCGAGAAAGAGGTGAGAAT      | 0  | 0  | 0  | 0   | 0  | 0  | 4  | 0   | low    |
| 487 | PC-5p-411016_5          | CATGCAGCCTTTTACACCAGG    | 0  | 0  | 0  | 0   | 0  | 6  | 0  | 0   | low    |



|     |                          |                          |     |     |     |     |     |     |     |     |        |
|-----|--------------------------|--------------------------|-----|-----|-----|-----|-----|-----|-----|-----|--------|
| 488 | PC-5p-459946_5           | AAGATTTTCATGGGACGGAG     | 0   | 0   | 0   | 0   | 0   | 6   | 0   | 0   | low    |
| 489 | PC-3p-436682_5           | GTAACACTAACTGGATGACC     | 0   | 0   | 0   | 0   | 0   | 6   | 0   | 0   | low    |
| 490 | PC-3p-402430_5           | ACTGGCCCACTCTTTCTTGCC    | 0   | 0   | 0   | 0   | 0   | 6   | 0   | 0   | low    |
| 491 | PC-3p-425263_5           | CTCTGGAGGGCTGATGTCTC     | 0   | 0   | 0   | 0   | 0   | 6   | 0   | 0   | low    |
| 492 | PC-5p-335886_7           | AGAGATGTATCAGGTGCC       | 0   | 0   | 0   | 0   | 0   | 0   | 3   | 0   | low    |
| 493 | PC-5p-232503_16          | GGATTTTGGAGATAGAAGT      | 0   | 0   | 0   | 0   | 0   | 0   | 13  | 0   | middle |
| 494 | PC-5p-325143_7           | AGGAGGAGGTGTGAAGGAAA     | 0   | 0   | 0   | 0   | 0   | 0   | 6   | 0   | low    |
| 495 | PC-5p-178727_26          | TGGAGAGCATAGAAGAGAGAA    | 0   | 0   | 0   | 0   | 0   | 0   | 12  | 0   | middle |
| 496 | PC-3p-332986_7           | AGTGAAAGAGAACCTAAAACC    | 0   | 0   | 0   | 0   | 0   | 8   | 0   | 0   | low    |
| 497 | PC-5p-309768_8           | GTGGAGAGCATAGAAGAGA      | 0   | 0   | 0   | 0   | 0   | 0   | 4   | 0   | low    |
| 498 | PC-3p-339787_7           | AGTATAAAATAAGAAAAGAGAA   | 0   | 0   | 0   | 0   | 0   | 0   | 3   | 0   | low    |
| 499 | PC-5p-420437_5           | CCAGTTCAGATTGCAGGCT      | 0   | 0   | 0   | 0   | 0   | 6   | 0   | 0   | low    |
| 500 | PC-5p-358438_6           | TGTTAAGGAACTCGGCAAGTTG   | 0   | 0   | 0   | 0   | 0   | 3   | 0   | 0   | low    |
| 501 | mmu-miR-151-5p           | TCGAGGAGCTCACAGTCTAGT    | 403 | 48  | 94  | 69  | 74  | 356 | 117 | 191 | high   |
| 502 | PC-3p-222577_17          | GAAACAGACCCCTGAAATCA     | 5   | 0   | 0   | 0   | 9   | 0   | 0   | 3   | low    |
| 503 | PC-5p-209999_20          | AGAGGAGAAGTGAGAGCTT      | 6   | 9   | 0   | 0   | 0   | 0   | 0   | 4   | low    |
| 504 | cgr-miR-1260             | ATCCCACCGCTGCCACCA       | 0   | 0   | 0   | 7   | 0   | 0   | 4   | 6   | low    |
| 505 | PC-3p-151544_34          | GTAGGGTGAGGAAAAGAA       | 0   | 0   | 15  | 16  | 0   | 0   | 5   | 3   | middle |
| 506 | PC-3p-79797_78           | TAGGATGTTGGCTTAGAAG      | 0   | 27  | 37  | 0   | 10  | 11  | 0   | 12  | middle |
| 507 | PC-5p-160315_31          | AAGATGGGCACTCTGGAGA      | 52  | 0   | 0   | 0   | 0   | 0   | 4   | 0   | middle |
| 508 | mmu-miR-99b-5p           | CACCCGTAGAACCACCTTGCG    | 16  | 31  | 52  | 39  | 26  | 21  | 46  | 79  | middle |
| 509 | mmu-miR-199b-5p_1ss10TC  | CCCAGTGTTCAGACTACCTGTTC  | 4   | 0   | 0   | 0   | 0   | 0   | 1   | 19  | middle |
| 510 | mmu-miR-199a-5p          | CCCAGTGTTCAGACTACCTGTTC  | 4   | 0   | 0   | 0   | 0   | 0   | 1   | 19  | middle |
| 511 | PC-5p-151035_34          | GTGACAATGGCGGTAGGG       | 7   | 10  | 0   | 33  | 0   | 0   | 3   | 11  | middle |
| 512 | mmu-miR-106b-3p_L+2R-2   | TACCGCACTGTGGTACTTGCT    | 11  | 0   | 0   | 0   | 0   | 0   | 6   | 10  | middle |
| 513 | mmu-miR-125a-5p_R-2      | TCCTTGAGACCCTTTAACCTGT   | 10  | 28  | 51  | 60  | 36  | 13  | 48  | 267 | high   |
| 514 | PC-3p-147353_36          | GGAGAATCAGACTGTCAAG      | 12  | 7   | 11  | 0   | 0   | 30  | 0   | 12  | middle |
| 515 | PC-5p-129669_43          | TTTGGGAGAAGGGGTGCC       | 13  | 27  | 30  | 17  | 24  | 0   | 5   | 33  | middle |
| 516 | bta-miR-150              | TCTCCCAACCCTTGTACCAGTGT  | 4   | 0   | 0   | 0   | 0   | 0   | 0   | 26  | middle |
| 517 | PC-3p-133086_41          | TGCCGGAGGATTACAAAG       | 4   | 0   | 23  | 0   | 14  | 0   | 4   | 9   | middle |
| 518 | mmu-miR-30b-5p           | TGTAAACATCCTACACTCAGCT   | 131 | 161 | 117 | 135 | 107 | 181 | 123 | 135 | high   |
| 519 | PC-3p-194053_23          | GCAGAGTCGTGACGCAGAG      | 0   | 0   | 0   | 4   | 0   | 0   | 1   | 7   | low    |
| 520 | mmu-miR-1a-3p            | TGGAATGTAAGAAGTATGTAT    | 7   | 0   | 0   | 0   | 0   | 10  | 0   | 2   | low    |
| 521 | mmu-miR-92a-3p_R+1       | TATTGCCTTGTCCCGCCTGT     | 731 | 73  | 115 | 84  | 136 | 638 | 183 | 290 | high   |
| 522 | PC-5p-26214_223          | ACAATGGCAGGTACAGAGA      | 23  | 25  | 98  | 19  | 17  | 24  | 0   | 41  | middle |
| 523 | mmu-miR-144-3p_R-1       | TACAGTATAGATGATGTAC      | 35  | 0   | 10  | 0   | 17  | 46  | 4   | 20  | middle |
| 524 | PC-3p-9044_516           | AGACTGACGCTGAGGCAC       | 156 | 106 | 51  | 62  | 60  | 66  | 204 | 97  | high   |
| 525 | PC-5p-183753_25          | CAGGATAGGTGGGAGGCTGA     | 0   | 9   | 0   | 13  | 0   | 0   | 0   | 6   | middle |
| 526 | PC-5p-11519_431          | GTGGAGAGATGTGAAGAGAGA    | 196 | 139 | 216 | 150 | 220 | 29  | 281 | 46  | high   |
| 527 | PC-3p-97109_62           | GAGGGGAGGCCGAGAGAA       | 12  | 0   | 0   | 0   | 0   | 0   | 19  | 3   | middle |
| 528 | PC-5p-190381_23          | GAAGGAACGGTAAAAGGA       | 4   | 0   | 0   | 0   | 7   | 0   | 6   | 6   | low    |
| 529 | PC-3p-19325_287          | ACACAGGTAGACGAGAAGAAA    | 197 | 126 | 304 | 159 | 103 | 208 | 122 | 103 | high   |
| 530 | PC-3p-129204_43          | CCTGGGCGAGGCTCTCGAGA     | 5   | 0   | 22  | 0   | 0   | 0   | 20  | 12  | middle |
| 531 | bta-miR-2478_L-2         | ATCCCCTTCTGACACCA        | 4   | 12  | 0   | 21  | 7   | 0   | 9   | 8   | middle |
| 532 | PC-3p-25177_231          | TGGAGAGATGTGAAGAGAGA     | 14  | 11  | 17  | 16  | 14  | 6   | 21  | 3   | middle |
| 533 | PC-5p-59165_107          | TAAGAGGAGGGGTCAGGAGA     | 0   | 25  | 17  | 77  | 37  | 49  | 26  | 49  | middle |
| 534 | PC-3p-359_4224           | TGATGTGTAGGATAGGCC       | 360 | 719 | 224 | 451 | 471 | 324 | 615 | 681 | high   |
| 535 | mmu-miR-203-3p_R+1       | GTGAAATGTTTAGGACCACCTAGA | 30  | 25  | 10  | 16  | 7   | 12  | 8   | 20  | middle |
| 536 | PC-5p-192678_23          | AGTTCTATCACAGGAGTGA      | 0   | 7   | 0   | 0   | 0   | 0   | 3   | 7   | low    |
| 537 | PC-5p-141289_38          | GCTGTGCTGGAAGTGGTGA      | 8   | 0   | 15  | 9   | 0   | 9   | 8   | 8   | middle |
| 538 | PC-3p-7141_612           | AGAGAGGACCGAAAGAGA       | 55  | 55  | 52  | 82  | 74  | 46  | 180 | 60  | high   |
| 539 | mmu-miR-215-5p_R+1       | ATGACCTATGATTTGACAGACC   | 601 | 635 | 646 | 654 | 589 | 692 | 603 | 357 | high   |
| 540 | mmu-miR-185-5p           | TGGAGAGAAAAGGCAGTTCCTGA  | 316 | 34  | 22  | 27  | 51  | 316 | 81  | 71  | high   |
| 541 | ssc-mir-9843-p5_1ss5AT_1 | AGAATCCTCTGGAAAGTG       | 132 | 222 | 23  | 52  | 164 | 146 | 43  | 75  | high   |
| 542 | ssc-mir-9843-p5_1ss5AT_2 | AGAATCCTCTGGAAAGTGG      | 132 | 222 | 23  | 52  | 164 | 146 | 43  | 75  | high   |
| 543 | mmu-miR-8101_R-3_1ss11GA | GGCGAGCGGAACCGGAGGA      | 10  | 0   | 66  | 0   | 0   | 0   | 18  | 0   | middle |
| 544 | PC-3p-162671_31          | GGGAAAGCAGACGAGAAAGG     | 10  | 0   | 0   | 0   | 10  | 20  | 2   | 3   | middle |
| 545 | PC-5p-112241_52          | GTCTGGGCAGGATAAGTGC      | 12  | 9   | 0   | 0   | 0   | 6   | 8   | 4   | middle |
| 546 | PC-3p-59976_106          | GGAGTCAGGCTGCACGAGA      | 23  | 19  | 72  | 27  | 36  | 26  | 38  | 22  | middle |
| 547 | PC-5p-225587_17          | CTGCAAAGCTAGAGTATGA      | 0   | 0   | 0   | 37  | 0   | 8   | 0   | 0   | middle |
| 548 | mmu-miR-31-5p_R+1        | AGGCAAGATGCTGGCATAGCTGT  | 6   | 28  | 23  | 21  | 0   | 6   | 22  | 5   | middle |

|     |                          |                          |       |       |       |       |       |       |       |       |        |
|-----|--------------------------|--------------------------|-------|-------|-------|-------|-------|-------|-------|-------|--------|
| 549 | PC-5p-275224_11          | GCAAGTCTGAAGTGAAGG       | 4     | 9     | 0     | 14    | 0     | 6     | 5     | 0     | middle |
| 550 | PC-3p-17270_314          | CGAAAGTCTGAGGTTTCCT      | 81    | 119   | 84    | 103   | 117   | 170   | 6     | 23    | high   |
| 551 | mmu-miR-27b-3p           | TTCACAGTGGCTAAGTTCTGC    | 535   | 386   | 392   | 298   | 251   | 440   | 177   | 338   | high   |
| 552 | mmu-miR-24-2-5p          | GTGCCTACTGAGCTGAAACAGT   | 8     | 0     | 0     | 0     | 0     | 6     | 3     | 0     | low    |
| 553 | mmu-miR-196a-5p          | TAGGTAGTTTCATGTTGTTGGG   | 0     | 0     | 4     | 4     | 9     | 3     | 2     | 3     | low    |
| 554 | PC-5p-210541_19          | GACACTGTTAGGCGGGCAG      | 6     | 0     | 7     | 0     | 0     | 0     | 0     | 4     | low    |
| 555 | bta-miR-6529a            | GAGAGATCAGAGGCGCAGAGT    | 2     | 0     | 0     | 0     | 0     | 4     | 0     | 0     | low    |
| 556 | cpo-miR-6529-5p          | GAGAGATCAGAGGCGCAGAGT    | 2     | 0     | 0     | 0     | 0     | 4     | 0     | 0     | low    |
| 557 | PC-3p-383358_6           | CAGTGCCTGGAAGGTTAAGG     | 0     | 9     | 0     | 0     | 0     | 0     | 2     | 0     | low    |
| 558 | PC-5p-126272_45          | CAGAACGTGGGGACGTA        | 10    | 9     | 23    | 13    | 9     | 7     | 2     | 19    | middle |
| 559 | PC-3p-273813_11          | TTAGGGCTAGCGTTGTATT      | 0     | 0     | 0     | 30    | 0     | 0     | 2     | 6     | middle |
| 560 | PC-5p-265815_12          | GATAGGATGCAGGTGTAA       | 0     | 9     | 0     | 7     | 0     | 0     | 3     | 4     | low    |
| 561 | PC-5p-112615_52          | TTAAGTCAGTTGTGAAAGT      | 0     | 18    | 0     | 10    | 11    | 9     | 4     | 5     | middle |
| 562 | mmu-miR-126a-3p          | TCGTACCGTGAGTAATAATGCG   | 6     | 15    | 40    | 44    | 47    | 0     | 37    | 110   | middle |
| 563 | mmu-miR-205-5p_R+1       | TCCTTCATTCCACCGAGTCTGT   | 4     | 0     | 0     | 7     | 0     | 0     | 0     | 16    | middle |
| 564 | mmu-miR-192-5p           | CTGACTATGAATTGACAGCC     | 2,729 | 2,045 | 2,066 | 1,881 | 1,613 | 2,850 | 2,206 | 1,734 | high   |
| 565 | mmu-miR-486b-5p_R+1      | TCCTGTACTGAGCTGCCCGAGT   | 8,227 | 1,125 | 1,387 | 1,353 | 1,649 | 7,797 | 679   | 3,652 | high   |
| 566 | mmu-miR-378d_1ss6CA      | ACTGGACTTGGAGTCAGAAGGT   | 2     | 6     | 0     | 6     | 4     | 6     | 4     | 3     | low    |
| 567 | PC-3p-114965_51          | GGTTCGACTCCCGGTGTTGGGAAC | 7     | 0     | 11    | 0     | 9     | 16    | 0     | 8     | middle |
| 568 | PC-5p-163628_30          | GATGAGGCGTGGGTAGGGGA     | 0     | 13    | 10    | 30    | 23    | 0     | 0     | 29    | middle |
| 569 | PC-3p-181823_25          | AAACCGGAGGATTTATTCT      | 10    | 0     | 8     | 0     | 0     | 7     | 0     | 0     | middle |
| 570 | mmu-miR-10b-5p_R-1       | TACCCTGTAGAACCGAATTTGT   | 48    | 173   | 379   | 329   | 46    | 34    | 340   | 36    | high   |
| 571 | mmu-miR-130a-3p          | CAGTGCAATGTTAAAAGGGCAT   | 4     | 0     | 0     | 7     | 0     | 0     | 0     | 4     | low    |
| 572 | mmu-let-7e-5p            | TGAGGTAGGAGTTGTATAGTT    | 9     | 0     | 0     | 10    | 0     | 0     | 5     | 11    | middle |
| 573 | PC-3p-212704_19          | GCATGGAAGCCAGAAGAAC      | 0     | 0     | 18    | 0     | 7     | 9     | 0     | 0     | middle |
| 574 | PC-3p-101134_59          | GTGGGATTGATGACTGGGG      | 4     | 30    | 37    | 0     | 7     | 19    | 14    | 25    | middle |
| 575 | PC-3p-194678_22          | AGCAGAAGGGCCTGGAAAGG     | 26    | 18    | 0     | 0     | 9     | 20    | 0     | 0     | middle |
| 576 | mmu-miR-143-3p_R+1       | TGAGATGAAGCACTGTAGCTCT   | 37    | 21    | 36    | 21    | 48    | 0     | 16    | 147   | middle |
| 577 | mmu-miR-802-5p           | TCAGTAACAAAGATTCATCCTT   | 12    | 0     | 0     | 0     | 0     | 0     | 6     | 5     | middle |
| 578 | PC-3p-281599_11          | GTGAGCACGGGAGACAGAGC     | 5     | 0     | 0     | 0     | 0     | 6     | 0     | 0     | low    |
| 579 | PC-5p-62023_102          | GGGTGTAAGGGAGTGTAGG      | 7     | 16    | 15    | 19    | 16    | 20    | 2     | 14    | middle |
| 580 | PC-5p-113744_51          | AAGATAGAGTAGCGAAGCA      | 4     | 55    | 0     | 7     | 28    | 37    | 0     | 0     | middle |
| 581 | PC-5p-49634_127          | AGTTATATTGGCAATGAAGA     | 11    | 25    | 10    | 31    | 13    | 45    | 23    | 3     | middle |
| 582 | ssc-miR-7134-5p          | ATGTCCGCGGGTCCCTATCC     | 9     | 0     | 0     | 0     | 0     | 10    | 0     | 0     | middle |
| 583 | PC-5p-202544_21          | CACTGTGGAGGACCGAACC      | 0     | 12    | 0     | 0     | 0     | 7     | 0     | 4     | middle |
| 584 | PC-3p-218573_18          | AGGTAGAGCACTGGATTTTC     | 0     | 9     | 0     | 0     | 9     | 7     | 0     | 0     | low    |
| 585 | PC-5p-104193_57          | CAACCGTGAGCTCAGTGAA      | 23    | 10    | 0     | 0     | 0     | 7     | 3     | 5     | middle |
| 586 | PC-5p-227473_17          | AGTGGAGAAGGATGTGGGG      | 0     | 24    | 0     | 0     | 0     | 0     | 0     | 8     | middle |
| 587 | mmu-miR-141-3p           | TAACACTGTCTGGTAAAGATGG   | 166   | 312   | 354   | 292   | 279   | 185   | 273   | 326   | high   |
| 588 | ssc-mir-9843-p3_1ss6AT   | TAGAATCCTCTGAAAGTGG      | 8     | 10    | 0     | 4     | 9     | 22    | 2     | 2     | middle |
| 589 | PC-5p-34704_176          | TGTTTGGTGGGTAGTTTGA      | 23    | 31    | 10    | 13    | 23    | 40    | 12    | 19    | middle |
| 590 | PC-5p-83484_74           | GTAACCTCGGGATAAAGGGT     | 12    | 57    | 7     | 26    | 11    | 20    | 14    | 23    | middle |
| 591 | PC-5p-273716_11          | GACGCATGAGAAAAGATGA      | 0     | 7     | 0     | 0     | 0     | 0     | 3     | 0     | low    |
| 592 | mmu-miR-3968_L-3_1ss14AT | ATCCCACTCCTGACACCA       | 0     | 10    | 0     | 10    | 11    | 0     | 6     | 20    | middle |
| 593 | mmu-miR-10a-5p_R-1       | TACCCTGTAGATCCGAATTTGT   | 310   | 186   | 390   | 222   | 83    | 229   | 390   | 180   | high   |
| 594 | cfa-miR-194_R+1          | TGTAACAGCAACTCCATGTGGAT  | 48    | 51    | 63    | 135   | 63    | 75    | 73    | 49    | middle |
| 595 | mmu-miR-5099_L+2R-1      | TCTTAGATCGATGTGGTGCTC    | 0     | 0     | 0     | 7     | 0     | 0     | 7     | 0     | low    |
| 596 | PC-5p-122887_46          | ATGTGAGTGGAATGCCATC      | 6     | 0     | 10    | 10    | 0     | 0     | 8     | 5     | middle |
| 597 | PC-5p-105512_56          | CAGGTAGGCGAGGAGAGAA      | 12    | 18    | 8     | 0     | 7     | 0     | 13    | 21    | middle |
| 598 | PC-3p-122310_47          | CAAGGTTAAGTTGAAGAGA      | 0     | 0     | 0     | 10    | 11    | 0     | 7     | 9     | middle |
| 599 | PC-3p-223408_17          | GAGAGGGTAATGTAGTAAT      | 4     | 0     | 0     | 0     | 9     | 0     | 2     | 4     | low    |
| 600 | PC-3p-171771_28          | CGGAGGAAGAGAAAACAACA     | 6     | 0     | 0     | 0     | 10    | 0     | 3     | 4     | low    |
| 601 | PC-3p-63973_99           | AAAGAAAACAAAAGTATTGC     | 24    | 71    | 0     | 19    | 28    | 63    | 0     | 0     | middle |
| 602 | bta-miR-2284y_R+1_1ss2AG | AGAAGTTCGTTCCGGTTTTTCT   | 5     | 0     | 0     | 0     | 0     | 2     | 0     | 0     | low    |
| 603 | PC-5p-154828_33          | AAAGGAAGTAGCGAAGCA       | 6     | 12    | 0     | 7     | 0     | 18    | 0     | 3     | middle |
| 604 | mmu-miR-345-5p_L+1R-1    | TGCTGACCCCTAGTCCAGTGCT   | 0     | 7     | 0     | 0     | 0     | 0     | 0     | 3     | low    |
| 605 | mmu-miR-200b-5p          | CATCTTACTGGGCAGCATTGGA   | 9     | 18    | 0     | 24    | 0     | 20    | 5     | 11    | middle |
| 606 | PC-3p-67324_94           | AGTTATGTCGTGGGAGTTC      | 14    | 13    | 11    | 30    | 14    | 0     | 14    | 28    | middle |
| 607 | PC-3p-69490_91           | GGTGGAGAGATGTGAAGAGA     | 6     | 9     | 11    | 10    | 10    | 0     | 29    | 6     | middle |
| 608 | PC-5p-177896_26          | TCGGAGAGGCAGGCGGAA       | 0     | 7     | 0     | 10    | 7     | 7     | 0     | 6     | middle |
| 609 | PC-3p-230783_16          | CGGAAAGGCAAGTCAGAA       | 0     | 0     | 8     | 11    | 0     | 9     | 0     | 0     | middle |

|     |                        |                          |       |       |       |       |       |       |     |       |        |
|-----|------------------------|--------------------------|-------|-------|-------|-------|-------|-------|-----|-------|--------|
| 610 | PC-5p-185717_24        | GCAATGTGTGGAGCTGACA      | 0     | 0     | 0     | 9     | 10    | 7     | 2   | 0     | low    |
| 611 | mmu-miR-451a_R-1       | AAACCGTTACCATTACTGAGT    | 2,589 | 973   | 1,264 | 1,052 | 1,447 | 2,402 | 695 | 837   | high   |
| 612 | oan-miR-429-3p_R+2     | TAATACTGTCTGGTAATGCCGTAA | 0     | 0     | 0     | 9     | 0     | 0     | 3   | 4     | low    |
| 613 | PC-5p-231313_16        | AACAAGAGAGAATGCCGGA      | 7     | 0     | 0     | 0     | 0     | 0     | 3   | 0     | low    |
| 614 | PC-3p-147256_36        | GCAGAGTCGTGACGCAGA       | 0     | 0     | 8     | 14    | 0     | 0     | 6   | 10    | middle |
| 615 | PC-5p-204840_20        | AAGGGGAGGGCTCAGGGGA      | 3     | 0     | 0     | 0     | 0     | 0     | 3   | 0     | low    |
| 616 | PC-5p-115842_50        | AAGAAGGCAGGAGAACGGC      | 0     | 13    | 0     | 9     | 13    | 6     | 0   | 12    | middle |
| 617 | mmu-miR-574-3p         | CACGCTCATGCACACACCCACA   | 0     | 0     | 0     | 0     | 7     | 0     | 6   | 0     | low    |
| 618 | mmu-miR-182-5p_R-1     | TTTGGCAATGGTAGAACTCACACC | 85    | 65    | 99    | 63    | 70    | 118   | 59  | 65    | middle |
| 619 | PC-3p-19277_287        | ACAGGTTAGGGGAAAGTGC      | 49    | 65    | 58    | 79    | 71    | 24    | 114 | 72    | middle |
| 620 | PC-5p-151366_34        | GAGAATCATTGTTAAGGA       | 4     | 10    | 0     | 7     | 0     | 0     | 7   | 5     | middle |
| 621 | PC-5p-170687_28        | CGGAAGAAGGGGTGCCTGC      | 7     | 7     | 0     | 0     | 0     | 0     | 2   | 5     | low    |
| 622 | bta-miR-2285ba_1ss7TC  | AAACCCCGAACGAACTTTTGG    | 7     | 0     | 0     | 0     | 0     | 6     | 0   | 0     | low    |
| 623 | PC-3p-325246_7         | TAAGGTTAGAAGAATTGTGG     | 4     | 0     | 0     | 0     | 0     | 0     | 3   | 0     | low    |
| 624 | PC-3p-189725_24        | AGGGCACGTTGAAAAGTG       | 15    | 10    | 0     | 0     | 7     | 0     | 2   | 15    | middle |
| 625 | PC-5p-49200_128        | AGGAAC TGAGGGTGGGGGT     | 16    | 55    | 26    | 29    | 21    | 9     | 32  | 41    | middle |
| 626 | PC-3p-35_15356         | AGGATGTTGGCTTGGGAAGC     | 2,066 | 5,684 | 6,664 | 1,742 | 4,038 | 3,905 | 489 | 9,160 | high   |
| 627 | mmu-miR-139-5p_R+1     | TCTACAGTGCACGTGTCTCCAGT  | 0     | 12    | 0     | 19    | 0     | 0     | 10  | 11    | middle |
| 628 | mmu-miR-107-3p_R-5     | AGCAGCATTGTACAGGGC       | 0     | 3     | 9     | 14    | 4     | 0     | 8   | 12    | middle |
| 629 | PC-3p-167723_29        | GCCGGAGGAAGAGAAAAC       | 14    | 0     | 8     | 0     | 0     | 8     | 3   | 4     | middle |
| 630 | mmu-miR-32-5p_R-1      | TATTGCACATTACTAAGTTGC    | 0     | 0     | 0     | 7     | 0     | 0     | 5   | 0     | low    |
| 631 | PC-5p-421939_5         | TGTGGAGCTGACATGTA        | 4     | 0     | 0     | 0     | 0     | 0     | 0   | 3     | low    |
| 632 | PC-5p-180601_26        | AGGTAAGGCTGGGCACTCT      | 0     | 7     | 0     | 0     | 13    | 8     | 0   | 3     | middle |
| 633 | PC-3p-295085_10        | ATCTTTGGGGTTCGGACAGC     | 4     | 0     | 7     | 0     | 0     | 6     | 0   | 0     | low    |
| 634 | bta-miR-2285f          | AAAACCTGAATGAACTTTGG     | 6     | 0     | 0     | 0     | 0     | 4     | 0   | 0     | low    |
| 635 | mmu-miR-148a-3p        | TCAGTGCACACTACAGA        | 144   | 98    | 116   | 93    | 65    | 179   | 40  | 106   | high   |
| 636 | mmu-miR-466i-5p_L-1R-1 | GTGTGTGTGTGTGTGTGT       | 2     | 0     | 0     | 0     | 0     | 0     | 0   | 1     | low    |
| 637 | mmu-mir-466k-p5        | GTGTGTGTGTGTGTGTGT       | 2     | 0     | 0     | 0     | 0     | 0     | 0   | 1     | low    |
| 638 | cpo-miR-1271-5p        | CTTGCCACCTAGTAAGCACTCA   | 31    | 0     | 10    | 13    | 7     | 33    | 0   | 0     | middle |
| 639 | mmu-miR-200b-3p_R+1    | TAATACTGCCTGGTAATGATGAC  | 602   | 680   | 608   | 883   | 617   | 916   | 609 | 470   | high   |
| 640 | PC-3p-249540_14        | ATTGGCAATGAAGAAGAGTT     | 0     | 16    | 0     | 7     | 0     | 0     | 16  | 0     | middle |
| 641 | mmu-miR-449a-5p        | TGGCAGTGTATTGTTAGCTGGT   | 4     | 0     | 0     | 0     | 0     | 0     | 3   | 0     | low    |
| 642 | PC-5p-245451_14        | CGAGAGGAAGGTGGGAAT       | 0     | 0     | 18    | 0     | 9     | 0     | 6   | 9     | middle |
| 643 | PC-3p-229624_16        | AGGATGTTATCTTGGGAAGC     | 0     | 9     | 0     | 0     | 0     | 0     | 0   | 6     | low    |
| 644 | PC-3p-163766_30        | GGAGGGTCATTGGAACTG       | 19    | 0     | 0     | 14    | 9     | 13    | 0   | 11    | middle |
| 645 | mmu-miR-31-3p          | TGCTATGCCAACATATTGCCATC  | 5     | 0     | 0     | 0     | 0     | 0     | 3   | 0     | low    |
| 646 | PC-5p-47156_133        | AGGTGGGAGACTAGGAAGC      | 11    | 22    | 40    | 16    | 24    | 31    | 25  | 12    | middle |
| 647 | PC-5p-117670_49        | TCAGTGCCGGAGGCGAAGC      | 4     | 0     | 19    | 0     | 10    | 6     | 5   | 10    | middle |
| 648 | PC-3p-157006_32        | GAAGAAGGTAGATCGAGAG      | 0     | 0     | 21    | 11    | 0     | 7     | 5   | 8     | middle |
| 649 | PC-5p-45649_137        | TGCACAGACA               | 21    | 28    | 44    | 21    | 0     | 10    | 15  | 45    | middle |
| 650 | PC-3p-251106_14        | GAGACGAAAGGGAGAGGTA      | 0     | 0     | 0     | 17    | 0     | 0     | 4   | 7     | middle |
| 651 | ssc-mir-1285-p5        | ATCGCGCCTGTGAATAGCCACT   | 151   | 10    | 69    | 7     | 37    | 74    | 50  | 42    | middle |
| 652 | PC-3p-184887_25        | TCAAAAGGAGAGGTTAGGG      | 6     | 0     | 10    | 0     | 0     | 6     | 0   | 4     | low    |
| 653 | PC-3p-211313_19        | GTGTGAATGTAAGCAAATC      | 0     | 0     | 0     | 10    | 0     | 0     | 3   | 3     | middle |
| 654 | PC-5p-55135_115        | GGGGGTGAAAGGCTAATC       | 14    | 21    | 18    | 10    | 9     | 11    | 8   | 23    | middle |
